1 Original Research Article

2

3 Title: Moderate increases in channel discharge are positively related to ecosystem respiration in  
4 forested Ozark streams

5

6 Short title: Stream discharge is positively related to ecosystem respiration

7

8 Authors: Allyn K. Dodd<sup>1</sup>, Daniel D. Magoulick<sup>2</sup>, and Michelle A. Evans-White<sup>3</sup>

9

10 <sup>1</sup>Division of Natural Sciences, Lyon College, Batesville, AR 72501

11 <sup>2</sup>U.S. Geological Survey, Arkansas Cooperative Fish and Wildlife Research Unit, Department of Biological  
12 Sciences, University of Arkansas, Fayetteville, AR 72701

13 <sup>3</sup>Department of Biological Sciences, University of Arkansas, Fayetteville, AR 72701

14

15 *This draft manuscript is distributed solely for the purposes of scientific peer review. Its content is*  
16 *deliberative and predecisional, so it must not be disclosed or released by reviewers. Because the*  
17 *manuscript has not yet been approved for publication by the U.S. Geological Survey (USGS), it does not*  
18 *represent any official USGS findings or policy.*

19

20 Corresponding author: Email: [allyn.dodd@lyon.edu](mailto:allyn.dodd@lyon.edu), Phone: 501-307-7216

21

22

23

24

25

26

27

28

29

30

31

32

33

34 ABSTRACT

35           The natural flow regime is considered the “master variable” in lotic systems, controlling  
36 structure and function at organismal, population, community, and ecosystem levels. We sought  
37 to estimate forested headwater stream metabolism across two dominant flow regimes (*Runoff* and  
38 *Groundwater*) in northern Arkansas and evaluate potential differences in, and drivers of, gross  
39 primary production, ecosystem respiration, and net ecosystem metabolism. Flow regimes  
40 differed in intermittency, substrate heterogeneity, hyporheic connectivity, and dominant water  
41 source (subsurface runoff vs. groundwater), which we expected to result in differences in  
42 primary production and respiration. Average daily gross primary production (GPP) and  
43 ecosystem respiration (ER) estimated from field data collected from May 2015-June 2016 tended  
44 to be greater in *Groundwater* streams. Respiration was positively related to discharge ( $R^2= 0.98$   
45  $p< 0.0001$ ) and net metabolism became more heterotrophic with increasing average annual  
46 discharge across sites ( $R^2= 0.94$ ,  $p= 0.0008$ ). Characterizing ecosystem-level responses to  
47 differences in flow can reveal mechanisms governing stream metabolism and, in turn, provide  
48 information regarding trophic state and energy inputs as efforts continue to determine global  
49 trends in aquatic carbon sources and fates.

50

51

52

53

54

55

56

## 57 INTRODUCTION

58           The natural flow regime exerts primacy over water quality and quantity, habitat structure,  
59 disturbance regime, and, in turn, ecological processes and functions in lotic systems. Flow  
60 regime is characterized by the timing, duration, magnitude, frequency, and rate of change of  
61 water flowing through a channel over various temporal scales (Poff et al. 1997), arranging  
62 habitat space and thereby creating a unique template for life history strategies and community  
63 interactions (Southwood 1977, Poff and Ward 1990). Natural disturbances, such as flooding and  
64 drought, serve as life cycle prompts for many fishes and macroinvertebrates, whose reproductive  
65 cues are intimately linked with predictable, seasonal changes in flow (Poff and Ward 1989,  
66 Huryn and Wallace 2000, Humphries and Baldwin 2003, Lytle and Poff 2004). Flow regime is  
67 ultimately a byproduct of landscape-level processes and variation, as climate, topography,  
68 geology, vegetation, and soils interact to determine primary water sources (e.g. groundwater vs.  
69 subsurface runoff), quantity of within-channel flow, and geomorphology. Indeed, flow regime is  
70 typically a region- and land cover-specific phenomenon; streams reflect the diverse biomes that  
71 generate and sustain their flows as well as the relative contributions of groundwater, surface  
72 water, soil water, and precipitation (Hynes 1975, Poff et al. 1997, Carlisle et al. 2010).

73           Stream metabolism is an estimator of carbon (C) dynamics and an indicator of of nutrient  
74 cycling and trophic status that is sensitive to natural and anthropogenic disturbances, revealing  
75 ecosystem-level responses to changes in hydrology and geomorphology. Metabolism is  
76 comprised of gross primary production (GPP) and ecosystem respiration (ER), which yields the  
77 net amount of carbon fixed into biomass, or net ecosystem metabolism (NEM) (Hall and  
78 Hotchkiss 2017). Metabolism can reveal whole-stream responses to landscape changes as well as  
79 predict potential bottom-up effects on higher trophic levels. Ecosystem metabolism is driven by

80 proximal factors such as light and nutrients, which are influenced by the surrounding watershed  
81 (Bernot et al. 2010, Yates et al. 2013). The direct and indirect susceptibility of primary  
82 production and respiration to landscape-level variation makes it a useful metric for assessing  
83 impacts at the ecosystem level. Additionally, daily metabolism can vary temporally due to  
84 changes in light levels, organic matter inputs, algal biomass, and hydrology (Acuña et al. 2004,  
85 Roberts et al. 2007). Previous work assessing annual metabolism across multiple streams has  
86 focused primarily on the effects of biome and land use (Bott et al. 1985, Mulholland 2001,  
87 Bernot et al. 2010). The large dependence of other metabolism estimates on flow timing and  
88 magnitude (e.g. Uehlinger et al. 2003, Roberts et al. 2007, Qasem et al. 2018) suggests they will  
89 vary significantly across differing flow regimes within the same biome. Further, comparing  
90 function within and among hydrologic classifications provides insight into processes and  
91 variables controlling ecosystem function. A growing body of work has begun to address how  
92 stream metabolic regimes vary in time and space at multiple hierarchical scales (Appling et al.  
93 2018, Koenig et al. 2019, Savoy et al. 2019), and a subset of these efforts have focused  
94 specifically on hydrologic influences impacting production and respiration (Jones et al. 1995,  
95 Dodds et al. 1996, Battin 1999, Uehlinger 2000, Uehlinger et al. 2003, Vilches and Giorgi 2010,  
96 Leggieri et al. 2013, Cook et al. 2015, Rovelli et al. 2017, Reisinger et al. 2017, Demars et al.  
97 2019, O'Donnell and Hotchkiss 2019).

98 Existing conceptual models of headwater stream metabolism have posited that factors  
99 controlling metabolism differ by biome (Mulholland et al. 2001), land use category (Bernot et al.  
100 2010), and season (Roberts et al. 2007). In reference systems, biome and season are considered  
101 the primary drivers of differences across streams (Bott et al. 1985, Mulholland et al. 2001,  
102 Hornbach et al. 2015). However, others have shown distinct hydroecological regions at

103 hierarchical spatial scales characterized by significant variation in flow dynamics within a biome  
104 (Poff et al. 2006, Leasure et al. 2016). This variation arises from changes in geology and water  
105 sources across basins and sub-basins, which can result in differences in ecosystem function and  
106 carbon availability (Thoms and Parsons 2002).

107 Flow variability within a stream can be a determinant of annual metabolism, as flow  
108 extremes can exert a strong influence on organic matter movement through the system (Acuña et  
109 al. 2004, Roberts et al. 2007, Demars 2019). High flows can depress primary production  
110 (Uehlinger 2000, Uehlinger 2006) while increasing production rates in autumn by removing  
111 abscised leaves covering the benthos (Argerich et al. 2011). High flows can also influence  
112 respiration rates by reducing respiration initially due to loss of autotrophic biomass, then  
113 increasing rates as the autotrophic community recovers from scouring (Roberts et al. 2007,  
114 Izagirre et al. 2008). Consistently higher discharge, or higher discharge in one year compared to  
115 another, can depress primary production rates by preventing regrowth of algal biomass, while  
116 others have found clear relationships between hydrologic regime and benthic organic matter that  
117 supports respiration (Acuña et al. 2007, Demars 2019). Hot, dry summers that increase water  
118 temperature but reduce depth can support extensive algal production and may lead to an overall  
119 reduction in metabolic rates over summer in the absence of scouring floods (Izagirre et al. 2008).

120 Drying and flooding can both temporarily depress primary production and respiration,  
121 while the weeks following these disturbances are typically marked by high rates of production  
122 and respiration as algae recolonize the benthos (Uehlinger 2000, Uehlinger 2006). Specifically,  
123 the number of dry days, number of days experiencing high flows (defined as >75% average daily  
124 flow), and number of flood events affect production and respiration; the strength of this effect

125 would be dependent upon the magnitude, frequency, and duration of the disturbance (Biggs et al.  
126 2005, Palmer and Ruhi 2019).

127 Several natural flow categories have been identified for streams within the Ozark and  
128 Ouachita Interior Highlands in northern/western Arkansas, eastern Oklahoma, and southern  
129 Missouri (Leasure et al. 2016), but efforts to characterize these systems based on their unique  
130 hydrology in the field have only recently begun. Leasure et al. (2016) revealed distinct geographic  
131 areas demarcated by dominant flow types that are likely functionally unique. These flow  
132 classifications consist of subsurface runoff- and groundwater-fed systems, known as *Runoff Flashy*  
133 and *Groundwater Flashy* streams (hereafter *Runoff* and *Groundwater*), that are dominant in the  
134 Ozark and Boston Mountains ecoregions. Key differences between flow regimes are frequency  
135 and duration of low flow days, frequency of floods, channel substrate heterogeneity and size, and  
136 dominant water sources (e.g. groundwater versus subsurface runoff).

137 Both flow regimes experience flash floods marked by high magnitudes but short duration  
138 (Leasure et al. 2016). *Runoff* stream flow originates primarily from subsurface runoff originating  
139 from precipitation and tend to dry for several weeks during autumn. Mixing analysis has shown  
140 that, on average, 89 ( $\pm 6$ )% of *Runoff* base flows derive from precipitation in the form of interflow.  
141 *Groundwater* streams tend to flow perennially, with 79 ( $\pm 3$ )% of base flow coming from  
142 groundwater contributions (Dodd et al. 2020) coming through the hyporheic zone. *Groundwater*  
143 streams tend to exhibit less variable annual flows (Leasure et al. 2016).

144 Additionally, channel geomorphology and dominant substrate are markedly different  
145 between flow regimes. *Groundwater* streams are dominated by a mixture of substrate types,  
146 dominated by sand, gravel, and pebble with some cobble and boulder mixed in; substantial bed  
147 movement is common during high flow events. Conversely, *Runoff* streambeds are often

148 comprised of bedrock overlain in some areas by cobble and boulders. Substrate heterogeneity  
149 can alter near-bed flow and turbulence intensity, and in turn influence production rates  
150 (Cardinale et al. 2002), and a greater diversity of benthic substrate sizes may foster greater  
151 production in *Groundwater* streams. Our primary objective was to determine whether differences  
152 exist in stream gross primary production, ecosystem respiration, and net ecosystem production  
153 between *Runoff* and *Groundwater* streams and characterize natural variation in ecological-flow  
154 responses across seasons. We expected average GPP to be greater in *Groundwater* streams, as  
155 these streams tend to exhibit perennial flow, have relatively stable hydrology over the year, and  
156 exhibit low turbidity. We expected ER to be greater in *Groundwater* systems as well given that  
157 the heterogeneous benthic substrate may result in higher rates of respiration by providing spaces  
158 for organic matter to settle and pockets in the benthic and hyporheic zones for heterotrophic  
159 microbes to colonize.

160         We also sought to confirm that differences exist in stream discharge and flow metrics.  
161 We hypothesized that *Groundwater* streams would have greater annual discharge since these  
162 streams do not dry and have more sustained, less variable flows from groundwater.

163         We also examined potential drivers of metabolism across sites. We predicted positive  
164 relationships between GPP and light, nutrients (total N and total P), algal biomass, and a negative  
165 relationship between GPP and discharge, number of high flow days, number of floods, number  
166 of low flow days, and number of no flow days. We hypothesized that positive relationships  
167 would exist between ER and biofilm ash-free dry mass, nutrients, floods, high flow days, and  
168 discharge (Figure 1).

169

170 Figure 1. Conceptual diagram illustrating factors controlling stream metabolism, which  
 171 incorporates the natural flow regime of an area as influenced by biome, season, and land use.  
 172 This, in turn, can influence hydrologic responses to land use change. GPP and ER denote gross  
 173 primary production and ecosystem respiration, respectively.

## 174 METHODS

### 175 *STUDY SITES*

176 This study was conducted in six temperate, minimally impacted headwater streams in the  
 177 deciduous forests of Arkansas (Figure 2). We chose three *Groundwater* streams and three *Runoff*  
 178 streams categorized based on flow classifications modeled by Leasure et al. (2016). Study sites  
 179 were chosen based on membership in *Runoff Flashy* or *Groundwater Flashy* flow classes as well  
 180 as stream surface area, surrounding land cover, and presence of downstream USGS stream gauges.  
 181 Streams selected for the study were all headwater systems with forested land cover ranging from  
 182 84 to 95% of total watershed area (Stroud Water Research Center 2017) (Table 1).

183 Table 1. Site abbreviations and flow metrics for May 2015 through June 2016. Discharge  
 184 estimates reflect year-round measurements calculated from daily gauge data (Gauge) or from  
 185 discharge measured monthly in the field, which were taken at or near base flow (Field).

| Flow Classification | Site         | Abbreviation | %Forest | Watershed Area<br>(km <sup>2</sup> ) | Mean Discharge                               | Mean Discharge                               | No Flow Days | High Flow Days | Floods | Annual Rain (cm) |
|---------------------|--------------|--------------|---------|--------------------------------------|----------------------------------------------|----------------------------------------------|--------------|----------------|--------|------------------|
|                     |              |              |         |                                      | (Gauge)<br>(m <sup>3</sup> s <sup>-1</sup> ) | (Field)<br>(m <sup>3</sup> s <sup>-1</sup> ) |              |                |        |                  |
| Runoff              | Big Piney    | BPC          | 92.23   | 87                                   | 3.65                                         | 0.41                                         | 33           | 146            | 11     | 154              |
| Runoff              | Little Piney | LPC          | 94.73   | 86                                   | 1.49                                         | 0.90                                         | 47           | 106            | 11     | 141              |
| Runoff              | Murray       | MRY          | 94.04   | 65                                   | 1.16                                         | 0.42                                         | 0            | 121            | 11     | 141              |
| Groundwater         | Roasting Ear | REC          | 83.97   | 91                                   | 1.87                                         | 1.21                                         | 9            | 107            | 12     | 151              |
| Groundwater         | Spring       | SPR          | 85.28   | 101                                  | 1.54                                         | 0.48                                         | 0            | 137            | 13     | 137              |
| Groundwater         | Sylamore     | SYL          | 92.94   | 81                                   | 5.54                                         | 1.44                                         | 0            | 107            | 15     | 151              |

186  
 187 Figure 2. Map of flow regimes in the Ozark and Ouachita Interior Highlands based on Leasure et  
 188 al. (2016). Highlighted area shows individual study sites sampled from 2015-2016 across  
 189 northern Arkansas. Teal lines represent *Groundwater* streams. Light green lines represent  
 190 *Runoff* streams.

191 All streams are located within the Ozark National Forest in northern Arkansas and were  
 192 chosen based on the amount of surrounding forest in the watershed and a lack of tributaries or



193 ephemeral drains feeding into accessible reaches to prevent extraneous variables influencing GPP  
194 and ER. Vegetation surrounding both stream types was primarily oak and hickory trees forest  
195 (Woods et al. 2004). While all streams had similar surrounding landcover and vegetation, the  
196 geology underlying *Runoff* and *Groundwater* streams differ. *Groundwater* streams are found  
197 within a highly dissected limestone plateau. Conversely, the *Runoff* streams are found in an area  
198 dominated by green/gray shale and sandstone. Vegetation surrounding both stream types was  
199 primarily oak and hickory trees forest (Woods et al. 2004, Chapman et al. 2006, Stephenson et al.  
200 2007).

## 201 *METABOLISM RATES*

202 We calculated reach-scale metabolism using the open-channel single-station method  
203 (Odum 1956, Riley and Dodds 2012). Dissolved oxygen (DO) and temperature were measured  
204 every 15 minutes by Hydrolab DS5X multiparameter sondes (Hach Company, Loveland, CO)  
205 from May 2015 to June 2016 in a well-mixed area at the bottom of each study reach. Data were  
206 corrected as necessary by comparing with DO concentrations determined via Winkler titrations  
207 (Dodds et al. 2018). Reaeration coefficients as estimates of air-water gas exchange were  
208 determined via propane release in five out of six streams, while nighttime regression was utilized  
209 in one *Runoff* stream, Murray Creek (Hall and Hotchkiss 2017). Propane release was necessary in  
210 five streams because nighttime regressions yielded significant relationships between ER and air-  
211 water gas exchange, or reaeration, coefficients ( $K_{600}$ ), whereas no such relationship was present at  
212 Murray Creek. Corrections for groundwater contributions to reaches receiving appreciable inputs  
213 were made according to Hall and Tank (2005). Photosynthetically-active radiation (PAR)  
214 measurements were logged concurrently with metabolism parameters using an Odyssey light meter  
215 positioned in an area near the stream with open canopy. Stream metabolism was estimated based

216 on diel changes in DO, temperature, depth, and light measurements; we used R package  
217 StreamMetabolizer (Appling et al. 2018) to solve for GPP and ER utilizing a single-station  
218 metabolism maximum likelihood model with the core equation:

$$219 \quad O_2(t) = O_2(t - \Delta t) + \left( \frac{GPP_{Total}}{\underline{z}} \cdot \int_{u=t_0}^{t_1} PAR \right) + \left( \frac{ER_{Total}}{\underline{z}} \times \Delta t \right) + K(t)(O_{2sat}(t) - O_2(t))\Delta t$$

220 where  $t$  is time and  $\Delta t$  is the time step between measurements (15 minutes),  $\underline{z}$  is mean reach depth,  
221  $\int_{u=t_0}^{t_1} PAR$  is daily photosynthetically-active radiation, and  $K_{(t)}$  is air-water gas exchange corrected  
222 for temperature. Estimates of  $GPP_{Total}$  and  $ER_{Total}$  fitted by StreamMetabolizer yielded daily rates  
223 for every day that a sonde was deployed at each stream (from 158 to 215 days). Data were not  
224 collected every day of the 422-day study due to flash floods and/or unwadeable conditions, drying,  
225 and/or equipment failure. Seasonal GPP and ER were calculated by averaging daily rates from the  
226 beginning of the respective season (e.g. equinox or solstice). Overall average daily rates were  
227 calculated by averaging daily rates over the study period. Summing daily rates by season would  
228 hinder comparisons since we did not have equal numbers of sampling dates across streams, so  
229 averages of daily rates over each season are reported. Average daily rates for each flow class were  
230 computed by computing the mean of the three streams in that flow class' overall average daily  
231 rates.

## 232 *PHYSICOCHEMICAL VARIABLES*

233 To evaluate relationships between metabolism and flow metrics, we quantified high flow  
234 days, number of floods, and number of days with no flow. High flow days were defined as  
235 exceeding the 75<sup>th</sup> percentile of mean annual discharge at a site. Floods were quantified as  
236 distinct hydropeaks greater than 100% of mean annual flow calculated from gauge data and  
237 upstream-downstream discharge relationships between USGS gauges and discharge measured in  
238 each study reach. We measured discharge in each reach monthly from May 2015 to June 2016

239 using velocity-area gauging (Gore 2006). We measured median diameter (d<sub>50</sub>) of randomly  
240 selected stones across each discharge transect. One stone was randomly selected at each meter  
241 across every discharge transect during four spring and summer 2016 monthly sampling events.

242 Persulfate digests of unfiltered water samples taken at base or near-base flow during  
243 monthly sampling events were followed by colorimetric analyses to determine nutrient  
244 concentrations. Total nitrogen (TN) was measured monthly by automated cadmium reduction on  
245 a Lachat Quikchem 8500 (Hach Company, Loveland, CO). Total phosphorus (TP) was measured  
246 monthly using the ascorbic acid method (APHA 2005).

247 Canopy cover was determined for each stream channel once in summer and once following  
248 abscission using a densiometer to calculate percent coverage.

#### 249 *PERIPHYTON*

250 For algal biomass, we collected six cobbles per reach at six equidistant transects down the  
251 stream reach. Monthly algal biomass was determined beginning in summer 2015 by scrubbing  
252 rocks of algae by extracting chlorophyll *a* each from algal slurry in ethanol, then wrapping with  
253 aluminum foil to determine rock area from mass-area relationships (Steinman et al. 2006).

#### 254 *STATISTICS*

255 We used 2-way repeated-measures ANOVA to determine whether differences existed in  
256 metabolism, flow metrics, and periphyton biomass and biofilm ash-free dry mass between flow  
257 regimes by season. Linear regressions were employed to examine relationships between daily  
258 metabolism variables (GPP, ER, and NEP), physicochemical parameters (e.g. total nitrogen and  
259 phosphorus, temperature), biological metrics (e.g. chlorophyll *a*, biofilm ash-free dry mass), and  
260 flow metrics (e.g. gauge-calculated discharge, discharge measured by hand in each reach,  
261 number of low flow days, number of high flow days, coefficient of variation of daily flow,

262 number of floods). We evaluated relationships between variables with both gauge-calculated  
263 discharge, which yielded estimates of flow for all days of the study including extreme floods and  
264 times during which sondes were not deployed, and discharge measured in the reach monthly,  
265 which represented conditions under which sondes were deployed and did not include extreme  
266 high flows (Table 1). All statistical analyses were performed in R version 3.4.3. Statistical  
267 significance threshold was  $p \leq 0.05$ .

## 268 RESULTS

### 269 *METABOLISM*

270 There was no significant effect of flow regime on average daily GPP across seasons  
271 (Table 2), though *Groundwater* streams tended to show greater GPP all year except during  
272 winter (Figure 3). Average daily GPP was highest in summer 2016 in *Groundwater* streams,  
273 while *Runoff* streams exhibited the greatest average daily GPP in summer 2015. Total GPP  
274 ranged from 99.7 to 435.1 g O<sub>2</sub> m<sup>-2</sup> y<sup>-1</sup> in *Runoff* streams (days of record= 158-188 days), and  
275 289.5 to 405.4 g O<sub>2</sub> m<sup>-2</sup> y<sup>-1</sup> in *Groundwater* streams (days of record= 159-202 days). Big Piney  
276 and Murray Creek, two *Runoff* streams, had fairly constant rates of GPP over the study year, with  
277 very small increases in GPP during the spring and summer. Conversely, the third *Runoff* site,  
278 Little Piney, showed marked increases in production during the spring and summer months, with  
279 daily production remaining high until the stream dried in October. Similarly high daily  
280 production rates were found at Sylamore, a *Groundwater* stream, throughout the spring and  
281 summer, though production decreased from July to September. The other two *Groundwater* sites  
282 exhibited spring and summer production rates like Big Piney and Murray, both *Runoff* streams.  
283 However, *Groundwater* stream production appeared to be stimulated by floods that occurred at  
284 the end of 2015, while *Runoff* streams showed little to no such response. Additionally, all

285 *Groundwater* streams and one *Runoff* (Little Piney) revealed greater primary production in  
 286 summer 2016 compared to the previous year.

287 Table 2. Results of repeated measures Analysis of Variance (ANOVA) for variables of interest. \*

288 denote statistical significance.

| Dependent Variable<br>(2-way RM-ANOVA) | F-statistic         | p- value |
|----------------------------------------|---------------------|----------|
| <b>GPP</b>                             |                     |          |
| Flow                                   | $F_{(1,12)}= 1.06$  | 0.32     |
| Season                                 | $F_{(3,12)}= 0.96$  | 0.31     |
| Flow x Season                          | $F_{(5,12)}= 1.26$  | 0.48     |
| <b>ER</b>                              |                     |          |
| Flow                                   | $F_{(1,12)}= 0.08$  | 0.79     |
| Season                                 | $F_{(3,12)}= 0.18$  | 0.91     |
| Flow x Season                          | $F_{(5,12)}= 1.05$  | 0.39     |
| <b>Discharge</b>                       |                     |          |
| Flow                                   | $F_{(1,12)}= 2.15$  | 0.17     |
| Season                                 | $F_{(3,12)}= 2.86$  | 0.04*    |
| Flow x Season                          | $F_{(5,12)}= 1.41$  | 0.29     |
| <b>Total Nitrogen</b>                  |                     |          |
| Flow                                   | $F_{(1,12)}= 0.12$  | 0.75     |
| Season                                 | $F_{(3,12)}= 2.35$  | 0.17     |
| Flow x Season                          | $F_{(5,12)}= 2.54$  | 0.21     |
| <b>Total Phosphorus</b>                |                     |          |
| Flow                                   | $F_{(1,12)}= 0.04$  | 0.85     |
| Season                                 | $F_{(3,12)}= 2.35$  | 0.17     |
| Flow x Season                          | $F_{(5,12)}= 0.30$  | 0.61     |
| <b>Algal Biomass</b>                   |                     |          |
| Flow                                   | $F_{(1,12)}= 1.39$  | 0.27     |
| Season                                 | $F_{(3,12)}= 8.34$  | 0.0004*  |
| Flow x Season                          | $F_{(5,12)}= 2.78$  | 0.09     |
| <b>Ash-Free Dry Mass</b>               |                     |          |
| Flow                                   | $F_{(1,12)}= 18.56$ | 0.0005*  |
| Season                                 | $F_{(3,12)}= 6.60$  | 0.004*   |
| Flow x Season                          | $F_{(5,12)}= 2.21$  | 0.13     |

289

290

291

292

293 Figure 3. Seasonal average daily gross primary production (A) and respiration (B) in *Runoff*  
294 (white) and *Groundwater* (gray) streams. Error bars denote  $\pm 1$  standard error. n= 3 per flow  
295 regime.

296 We found no difference in average daily ER between flow regimes across seasons,  
297 though ER also tended to be greater in *Groundwater* streams. Average daily ER was greatest in  
298 spring 2016 across streams. Average daily GPP in *Runoff* streams was  $1.2 (\pm 0.54)$  g O<sub>2</sub> m<sup>-2</sup> d<sup>-1</sup>,  
299 while *Groundwater* streams averaged  $1.9 (\pm 0.27)$  g O<sub>2</sub> m<sup>-2</sup> d<sup>-1</sup>. Daily ER in *Runoff* streams  
300 averaged  $-2.1 (\pm 0.99)$  g O<sub>2</sub> m<sup>-2</sup> d<sup>-1</sup> and  $-5.2 (\pm 1.0)$  g O<sub>2</sub> m<sup>-2</sup> d<sup>-1</sup> in *Groundwater* streams. Daily  
301 rates of GPP and ER for each stream are shown in Figure 4. Total ER in *Runoff* streams ranged  
302 from  $-151.4$  to  $-771.2$  g O<sub>2</sub> m<sup>-2</sup> y<sup>-1</sup> and from  $-280.2$  to  $-1340.3$  g O<sub>2</sub> m<sup>-2</sup> y<sup>-1</sup> in *Groundwater*  
303 streams. Peaks in respiration rates over the year varied across all six sites. While Big Piney and  
304 Murray (*Runoff* streams) had low respiration rates (similar to GPP), trends in respiration in Little  
305 Piney were similar to those observed in *Groundwater* streams. Respiration was especially high in  
306 Little Piney and *Groundwater* streams during the summer of 2015 and spring 2016, though  
307 *Groundwater* streams overall showed greater rates over the year and elevated respiration  
308 extended well into the autumn of 2015. Respiration was also stimulated by the heavy flooding  
309 that occurred in December 2015. In *Groundwater* streams, respiration was greater in summer  
310 2016 than the previous year, while respiration- though low overall in comparison- was greater in  
311 summer 2015 than 2016 in *Runoff* streams.

312

313

314 Figure 4. Daily rates of gross primary production (GPP) (black) and ecosystem respiration (ER)  
315 (gray) in Big Piney, Little Piney, Murray, Roasting Ear, Spring, and Sylamore from May 2015 to  
316 June 2016. *Runoff* streams are shown in panels on the left, *Groundwater* streams are represented  
317 in panels on the right. n= number of days of record at each site. “Flood” denotes large floods that  
318 prevented data collection.

### 319 *PHYSICOCHEMICAL VARIABLES*

320 Stream discharge did not differ significantly across flow regimes but differed by season  
321 ( $F_{(5, 12)} = 2.86$ ,  $p = 0.04$ ) (Table 2), with discharge peaking in the spring following substantial  
322 heavy winter rains that resulted in extreme flash floods in four out of six sites (Figure 5).  
323 Discharge tended to be greater in *Groundwater* streams over the study period; however, these  
324 systems showed substantially elevated flows compared to *Runoff* streams during the spring  
325 across both 2015 and 2016. Between March and June 2016, *Groundwater* streams experienced  
326 one to two more high-flow events than *Runoff* streams. *Runoff* streams experienced two moderate  
327 storm events during summer 2015, while *Groundwater* streams experienced three smaller events  
328 during the same period. Little to no rain fell across Arkansas from early August to November 7,  
329 2015, causing two *Runoff* streams and one *Groundwater* stream to dry. However, *Runoff* streams  
330 that dried experienced longer drought periods, as Little Piney and Big Piney dried for 47 and 33  
331 days, respectively, whereas Roasting Ear (a *Groundwater* stream) dried for only 9 days.  
332 Precipitation inputs did not differ significantly across flow regimes ( $p = 0.85$ ). Over the year,  
333 *Runoff* sites received  $145 \pm 4$  cm of rainfall, while *Groundwater* sites received  $146 \pm 4$  cm. Flow  
334 metrics at each site are listed in Table 1.

335 Figure 5. Hydrographs for study sites from May 2015 to June 2016. Note differences in y-axis  
336 scales; scales were not standardized to preserve details of individual site hydrology.

337 Greater discharge stimulated respiration ( $R^2= 0.98$ ,  $p< 0.0001$ ) and drove streams to be  
338 more heterotrophic over the year ( $R^2= 0.94$ ,  $p= 0.0008$ ) (Figure 6). Discharge is often related to  
339 watershed area and stream size, though we did not find a relationship between watershed area  
340 and discharge ( $R^2= 0.004$ ,  $p= 0.89$ ). Cooler *Groundwater* streams had greater rates of primary  
341 production; GPP was negatively related to water temperature across sites ( $R^2= 0.63$ ,  $p= 0.04$ ). We  
342 found no further relationships between GPP or ER and physicochemical or biological variables.

343 Figure 6. Ecosystem respiration (A) and net ecosystem metabolism (B) compared with mean  
344 annual discharge measured in the field across flow regimes. These discharge measurements were  
345 taken only when streams were wadeable and thus represent variation in discharge across  
346 excluding high flows.

347 *Runoff* stream substrate types were primarily bedrock and cobble, while *Groundwater*  
348 streams were dominated by pebbles with a variety of other substrate sizes present (i.e. sand,  
349 gravel, cobble, and some boulders). Median particle size ( $d_{50}$ ) was 19 mm (range= 10- 82 mm)  
350 in *Runoff* streams and 13 mm (range= <1-110 mm ) in *Groundwater* streams.

351 Nutrient concentrations were not significantly different across sites and seasons,  
352 though both TN and TP tended to be greater in *Groundwater* streams (Table 2). Total N averaged  
353  $0.10 \pm 0.03$  mg/L in *Runoff* streams and  $0.56 \pm 0.26$  mg/L in *Groundwater* streams. Mean total P  
354 was  $6.21 \pm 0.63$   $\mu\text{g/L}$  in *Runoff* streams and  $8.70 \pm 1.38$   $\mu\text{g/L}$  in *Groundwater* streams.

355 We explored potential relationships between watershed land cover and nutrient  
356 concentrations to determine whether even forested systems could be experiencing impacts of  
357 surrounding anthropogenic activity. Instream phosphorus concentrations decreased as  
358 surrounding forested land cover increased within a watershed ( $R^2= 0.77$ ,  $p= 0.01$ ). We observed



359 a similar negative trend with respect to TN concentrations and forested land cover, though this  
360 relationship was not statistically significant ( $R^2= 0.56$ ,  $p= 0.09$ ).

### 361 *PERIPHYTON AND ORGANIC MATTER*

362 Algal biomass was not significantly different between flow regimes, though there was a  
363 seasonal effect ( $F_{(5, 12)}= 8.33$ ,  $p= 0.0004$ ) (Table 2) and algal biomass tended to be greater in  
364 *Groundwater* streams throughout the year. Algal biomass peaked in the spring of 2016 in all  
365 streams. Groundwater stream algal biomass over the year was  $3.4 \pm 1.4 \mu\text{g}/\text{cm}^2$  and Runoff  
366 stream algal biomass was less than half of that, averaging  $1.5 \pm 0.1 \mu\text{g}/\text{cm}^2$ . Organic matter  
367 measured as ash-free dry mass differed across seasons ( $F_{(3, 12)}= 6.60$ ,  $p= 0.004$ ) and was greater  
368 in *Groundwater* streams across all seasons except winter ( $F_{(1,12)}= 18.56$ ,  $p= 0.0005$ ) (Figure 7).  
369 Similar to algal biomass, mean *Groundwater* stream biofilm ash-free dry mass was  $11.7 \pm 1.5$   
370 mg, while Runoff streams yielded  $5.9 \pm 0.5$  mg.

371 Figure 7. Seasonal algal biomass (A) and biofilm slurry ash-free dry mass (B) in *Runoff* and  
372 *Groundwater* streams. Error bars denote  $\pm 1$  standard error.  $n= 3$  per flow regime.

373 We evaluated whether instream nutrient concentrations could be driving differences  
374 between algal biomass and ash-free dry mass. Neither TN nor TP were related to algal biomass  
375 (TP:  $R^2= 0.47$ ,  $p= 0.13$ , TN:  $R^2= 0.38$ ,  $p= 0.19$ ) or ash-free dry mass (TP:  $R^2= 0.10$ ,  $p= 0.56$ , TN:  
376  $R^2= 0.39$ ,  $p= 0.18$ ).

### 377 DISCUSSION

#### 378 *METABOLISM*

379 Primary production tended to be greater in *Groundwater* streams during spring and  
380 summer 2016, possibly resulting from *Groundwater* streams' greater spring flows, slightly  
381 smaller, more mobile benthic substrate, and limestone karst rather than shale and sandstone that

382 characterize the geology of *Runoff* sites. Discharge was greater in *Groundwater* streams during  
383 the spring, resulting from heavy rains that fell at the end of 2015. *Groundwater* streams  
384 experienced floods of much greater magnitude, and experienced elevated flows for the duration  
385 of the spring that were not the product of differences in rainfall between *Runoff* and  
386 *Groundwater* sites. While floods can depress primary production through scouring of the benthos  
387 (Grimm and Fisher 1984, Uehlinger et al. 2003, Roberts et al. 2007), moderately elevated  
388 discharge can stimulate production by reducing competition for light and nutrients through  
389 continuous thinning of the biofilm while more nutrients are transported downstream (Stevenson  
390 1990, Humphrey and Stevenson 1992). Further, channel substrate can influence GPP; in  
391 particular, a greater diversity of substrate sizes, as found in *Groundwater* streams, has been  
392 shown to increase primary production (Cardinale et al. 2002). The highly variable rock sizes  
393 included more mobile substrate that may have further stimulated GPP by providing more surface  
394 area for algal colonization and allowing for slight bed movement during spring rain events,  
395 which contrasts with the relatively homogeneous boulder and bedrock substrate of *Runoff*  
396 streams. Greater GPP in *Groundwater* streams may be a byproduct of channel substrate coupled  
397 with greater water clarity during the spring's higher flows; the benthos of each *Runoff* stream  
398 was difficult to observe if the water was more than approximately 0.5 meters deep (such as  
399 during the spring) due to the presence of minerals from glauconitic, easily-weathered green shale  
400 common to the Boston Mountains ecoregion (Caplan 1957, Caplan 1960), where *Runoff* streams  
401 are the dominant flow type. Conversely, *Groundwater* streams were clear year-round. While  
402 *Runoff* streams were warmer than *Groundwater* streams and contained more stable substrate for  
403 algal colonization, mineral effects on water clarity may have restricted primary production  
404 potential.

405           Similar to patterns reported in other forested systems and larger rivers, daily  
406 *Groundwater* stream GPP was greatest in spring and summer 2016, while summer 2015 had the  
407 greatest average GPP for *Runoff* streams (Mulholland et al. 2001, Acuña et al. 2004, Genzoli and  
408 Hall 2016). However, these trends differ from Roberts et al. (2007) in that GPP at Walker  
409 Branch was greatest during the spring and comparatively low during two consecutive summers.  
410 Uehlinger (2006) also reported GPP to be greatest in May over a 15-year period and lower in  
411 summers. *Runoff* stream GPP was lowest in spring 2015, coinciding with maximum algal  
412 biomass that may have reduced production rates due to competition. Daily *Groundwater* stream  
413 GPP was lowest in autumn 2015, which may have arisen from competition between benthic  
414 producers and microbes for resources, as reduced flows are common during early-to-mid autumn  
415 in Arkansas. It is worth noting that maximum algal biomass and production rates will not  
416 necessarily coincide. Algal biomass represents the state/structure of the algal community at a  
417 specific timepoint, and structure does not always directly reflect function (such as rates of  
418 production). At high levels of algal biomass, competition for light and nutrients may slow  
419 production rates (Sumner and Fisher 1979, Morin et al. 1999). While algae are allocating energy  
420 to maximize resource exploitation or resist the deleterious impacts of nutrient or light limitation  
421 due to lower competitive ability, there is less energy available for production, thus reducing  
422 primary production despite high biomass (McCormick 1996).

423           Respiration tended to be greater in *Groundwater* streams all year except during winter.  
424 This trend may have resulted from increased microbial activity post-abscission during the fall  
425 and a lack of large flood events through the summers and autumn. *Runoff* streams dried around  
426 the time of abscission, but even when rainfall replenished channel flow, respiration rates  
427 remained lower; a lack of substantial benthic storage in *Runoff* streams may have led to a net

428 export of organic matter once rains returned in November. More variable substrate size and a  
429 hyporheic corridor in *Groundwater* streams could have facilitated greater community respiration  
430 rates by providing spaces for organic matter storage and colonization of heterotrophic microbes  
431 (Demars 2019).

432         While our analyses did not reveal statistically significant differences in metabolism  
433 across flow regimes, *Groundwater* streams tended to have greater rates of GPP and ER that are  
434 likely biologically relevant to instream food webs and carbon dynamics. Production rates were  
435 two times greater in *Groundwater* streams in nearly every season, while respiration was, in some  
436 seasons, three and four times greater. *Groundwater* streams held significantly more biofilm ash-  
437 free dry mass, revealing that even marginally greater production and respiration rates can have  
438 noticeable effects on basal resources and the biological community. The tendency for  
439 *Groundwater* streams to have higher rates of GPP and ER through much of the year almost  
440 certainly influences algal and consumer community structure. Others have found relationships  
441 between metabolism and fish assemblages (Munn et al. 2020), and further work measuring  
442 invertebrate and fish assemblages across systems simultaneously with metabolism would provide  
443 insight into the potential link between biologically significant differences in stream metabolism  
444 and food web effects. Thus, while our statistical results did not detect an effect of flow regime on  
445 ecosystem function, that does not discount flow regime as an important variable shaping stream  
446 metabolic regime.

447         Our results show a stimulatory effect of discharge on ER, just as others have found  
448 (Roley et al. 2014). Greater discharge over the year may drive streams toward heterotrophy by  
449 transporting greater amounts of organic matter from riparian soils for microbes to consume  
450 (Demars 2019). Additionally, discharge, watershed area, and stream size are often strongly

451 correlated, and others have found GPP and ER to respond positively to drainage area (Mejia et  
452 al. 2019). While we did not find a direct relationship between watershed area and discharge in  
453 this study, this positive relationship between discharge and ER could potentially be an artifact of  
454 stream size. However, there was no relationship between discharge and GPP; thus, if stream size  
455 were affecting metabolism, it would be through its influence on heterotrophic and autotrophic  
456 carbon processing rather than production. Another possibility may be that grazers are mediating  
457 this relationship; herbivores may be more active in streams with lower discharge, thinning algal  
458 mats and increasing P:R ratios by ameliorating competition among periphyton, removing  
459 senescent cells, and ingesting microbes in the mat (Peckarsky et al. 2015).

460         The observed relationships between discharge and metabolism appear to be driven more  
461 by *Groundwater* than *Runoff* streams. Additionally, *Runoff* streams showed increased respiration  
462 then decreased at higher discharges. This could reflect potential flow class-specific differences in  
463 algal community composition, in which *Runoff* stream communities respond more variably to  
464 increases in discharge, though algal community data and flow-metabolism measurements from a  
465 greater number of streams would be needed to support this with certainty.

466         Greater discharge drove streams to be more heterotrophic due to streamflow stimulating  
467 ER with no detectable effect on GPP. This relationship between net ecosystem metabolism  
468 (NEM) and discharge may also have resulted from differences in hyporheic connectivity and  
469 channel substrate type and heterogeneity, reflecting an important point with respect to flow  
470 classifications: even during times of seemingly similar hydrologic conditions, ecosystem  
471 structure is an important mediator of functional responses from autotrophs and heterotrophs.

472         Mean annual discharge was the only flow variable we found to be related to metabolism  
473 in this study. This was likely through effects on organic matter transport coupled with the

474 presence or absence of a hyporheic corridor that provided additional space for biota to colonize  
475 as well as a source of continuous flow by groundwater intrusion. The importance of hyporheic  
476 connectivity and channel substrate to stream metabolism is well-documented, as carbon is  
477 utilized from surface water organic matter to support hyporheic respiration (Jones et al. 1995),  
478 and while greater discharge could have reduced microbial abundance in *Runoff* streams with no  
479 hyporheic refuge, it could have had a stimulatory effect in *Groundwater* streams with subsurface  
480 microbes benefitting from organic matter subsidies coming from upstream and the immediate  
481 riparian in elevated flows. The hyporheos is a crucial refuge for biota in streams that are  
482 susceptible to flash floods as well as drying (Dole-Olivier 2011, Stubbington 2012), and these  
483 two flow classifications exhibited distinct disturbance regimes over the course of the study;  
484 namely, *Runoff* streams are susceptible to drying, while *Groundwater* streams tend to experience  
485 more flood events of greater magnitude. *Groundwater* streams' connectivity to groundwater  
486 may have facilitated greater production and respiration in *Groundwater* streams during certain  
487 times of the year by providing asylum for biota to resist to the effects of drying (in the one  
488 *Groundwater* stream that dried for nine days) and flooding. In short, discharge and disturbance  
489 regimes are different across flow regimes, but hyporheic connectivity may mitigate impacts of  
490 drying and flooding on *Groundwater* stream metabolism.

491         Temperature and light have been shown to synergistically enhance the photosynthetic  
492 capacity of primary producers. Temperature can also be predictive of respiration, as it exerts  
493 control on the speed of organismal metabolism (Hill et al. 2000, Mulholland et al. 2001, Acuña  
494 et al. 2008, Beaulieu et al. 2013). Interestingly, we found the opposite trend- cooler streams had  
495 greater rates of respiration. However, this effect of temperature may be related to the volume of

496 groundwater flowing into the system and actually be an indirect measure of groundwater  
497 influence (Constantz 1998).

498         Similar to Bernot et al. (2010), we identified no relationships between phosphorus and  
499 GPP. However, other inter-regional studies have determined P to be a driver of GPP, and P  
500 concentrations were similar to those reported by others in forested systems (Lamberti and  
501 Steinman 1997, Mulholland et al. 2001). Our study sites exhibited low P concentrations; there  
502 was not a large gradient in TP concentrations, as these streams were minimally-impacted  
503 forested systems. The same was true of nitrogen; total N was also not related to GPP or ER.  
504 Others have also found N to be a significant predictor of GPP (Bernot et al. 2010). However,  
505 nutrient concentrations were similarly low across sites throughout the study, and our results  
506 indicate that the primary influence on metabolism across *Groundwater* and *Runoff* sites was  
507 channel discharge.

#### 508 *CONCLUSION*

509         This comparison of forested systems across flow types provides a foundation for refining  
510 comparisons of stream metabolism across systems that may be similar in surrounding land cover,  
511 but differ in intermittency, discharge, dominant water source, and hyporheic connectivity. This  
512 provides insight into natural variation based on differences in flow versus anthropogenic  
513 hydrologic alteration but can also inform predictions regarding how depletion of groundwater  
514 resources can influence flow-function relationships. Loss of groundwater inputs will render  
515 stream biota more susceptible to droughts and will reduce the capacity to transport organic  
516 matter downstream for heterotrophic processing and sustenance of microbial carbon stocks that  
517 are important for lotic communities (Battin 1999, Demars 2019).

518 Our efforts reveal that forested stream metabolism rates are dependent upon discharge  
519 and exhibit seasonal trends based on flow regime classification. While biome and land use play  
520 key roles in determining stream metabolism, other factors such as streambed stability, hyporheic  
521 connectivity, and dominant water source may interact with landscape-level variables to produce  
522 variation in carbon dynamics across streams with similar land cover. These controls and flow-  
523 function relationships must be integrated across ecosystems as we work to understand sources,  
524 fates, and drivers of carbon transformation and transport in aquatic systems (Bernhardt et al.  
525 2017, Hotchkiss et al. 2018).

#### 526 ACKNOWLEDGEMENTS

527 We are grateful to Blake Lefler, Tyler Fletcher, Delaney Hall, Kayla Sayre, Hal Halvorson, Brad  
528 Austin, and Richard Walker for field assistance. We warmly thank Brian Haggard, Kristofor  
529 Brye, Kusum Naithani for suggestions on earlier versions on the manuscript. This work was  
530 funded by the USGS 104b program through the Arkansas Water Resources Center in FY2015.  
531 Any use of trade, firm, or product names is for descriptive purposes only and does not imply  
532 endorsement by the U.S. Government.

#### 533 REFERENCES

- 534 Acuña V, Giorgi A, Muñoz I, Uehlinger UR, Sabater S. Flow extremes and benthic organic  
535 matter shape the metabolism of a headwater Mediterranean stream. *Freshwater Biology*.  
536 2004 Jul;49(7):960-71.
- 537 Acuña V, Giorgi A, Muñoz I, Sabater F, Sabater S. Meteorological and riparian influences on  
538 organic matter dynamics in a forested Mediterranean stream. *Journal of the North American*  
539 *Benthological Society*. 2007 Mar;26(1):54-69.
- 540 Acuña V, Wolf A, Uehlinger U, Tockner K. Temperature dependence of stream benthic  
541 respiration in an Alpine river network under global warming. *Freshwater Biology*. 2008  
542 Oct;53(10):2076-88.
- 543 Allan JD. Landscapes and riverscapes: the influence of land use on stream ecosystems. *Annu.*  
544 *Rev. Ecol. Evol. Syst.*. 2004 Dec 15;35:257-84.



- 545 Appling AP, Hall RO, Arroita M, Yackulic CB. streamMetabolizer: Models for estimating  
546 aquatic photosynthesis and respiration. R package version 0.10. 2017;9.  
547 <https://github.com/USGS-R/streamMetabolizer>  
548
- 549 Appling AP, Read JS, Winslow LA, Arroita M, Bernhardt ES, Griffiths NA, Hall Jr RO, Harvey  
550 JW, Heffernan JB, Stanley EH, Stets EG. The metabolic regimes of 356 rivers in the United  
551 States. *Scientific data*. 2018 Dec 11;5:180292.
- 552 Argerich A, Martí E, Sabater F, Ribot M. Temporal variation of hydrological exchange and  
553 hyporheic biogeochemistry in a headwater stream during autumn. *Journal of the North  
554 American Benthological Society*. 2011 Sep;30(3):635-52.
- 555 Arthington AH, Bunn SE, Poff NL, Naiman RJ. The challenge of providing environmental flow  
556 rules to sustain river ecosystems. *Ecological applications*. 2006 Aug;16(4):1311-8.
- 557 Arthington AH. *Environmental flows: saving rivers in the third millennium*. Univ of California  
558 Press; 2012 Oct 15.
- 559 Austin BJ. Effects of landscape disturbances on autotrophic processes within Arkansas Ozark  
560 streams. Doctoral Dissertation, University of Arkansas. 2015.
- 561 Beaulieu JJ, Arango CP, Balz DA, Shuster WD. Continuous monitoring reveals multiple controls  
562 on ecosystem metabolism in a suburban stream. *Freshwater Biology*. 2013 May;58(5):918-  
563 37.
- 564 Bernhardt ES, Heffernan JB, Grimm NB, Stanley EH, Harvey JW, Arroita M, Appling AP,  
565 Cohen MJ, McDowell WH, Hall Jr RO, Read JS. The metabolic regimes of flowing waters.  
566 *Limnology and Oceanography*. 2018 Mar;63(S1):S99-118.
- 567 Bernot MJ, Sobota DJ, Hall Jr RO, Mulholland PJ, Dodds WK, Webster JR, Tank JL, Ashkenas  
568 LR, Cooper LW, Dahm CN, Gregory SV. Inter-regional comparison of land-use effects on  
569 stream metabolism. *Freshwater Biology*. 2010 Sep;55(9):1874-90.
- 570 Biggs BJ, Nikora VI, Snelder TH. Linking scales of flow variability to lotic ecosystem structure  
571 and function. *River research and applications*. 2005 Feb;21(2-3):283-98.
- 572 Blum AG, Ferraro PJ, Archfield SA, Ryberg KR. Causal effect of impervious cover on annual  
573 flood magnitude for the United States. *Geophysical Research Letters*. 2020 Mar  
574 16;47(5):no-.
- 575 Bott TL, Brock JT, Dunn CS, Naiman RJ, Ovink RW, Petersen RC. Benthic community  
576 metabolism in four temperate stream systems: an inter-biome comparison and evaluation of  
577 the river continuum concept. *Hydrobiologia*. 1985 Apr 1;123(1):3-45.
- 578 Bruckerhoff LA, Magoulick DD. Hydrologic regimes as potential drivers of morphologic  
579 divergence in fish. *Evolutionary Ecology*. 2017 Aug 1;31(4):517-31.

- 580 Caplan, WM. Subsurface geology of northwestern Arkansas. 1957 Little Rock, Arkansas  
581 Geological and Conservation Commission Information Circular 19:14.
- 582 Caplan, WM. Subsurface geology of Pre-Everton rocks in northern Arkansas. 1960. Little Rock,  
583 Arkansas Geological and Conservation Commission Information Circular 21:17.
- 584 Cardinale BJ, Palmer MA, Swan CM, Brooks S, Poff NL. The influence of substrate  
585 heterogeneity on biofilm metabolism in a stream ecosystem. *Ecology*. 2002 Feb;83(2):412-  
586 22.
- 587 Carlisle DM, Falcone J, Wolock DM, Meador MR, Norris RH. Predicting the natural flow  
588 regime: models for assessing hydrological alteration in streams. *River Research and  
589 Applications*. 2010 Feb;26(2):118-36.
- 590 Chapman RA, Heitzman E, Shelton MG. Long-term changes in forest structure and species  
591 composition of an upland oak forest in Arkansas. *Forest Ecology and Management*. 2006  
592 Nov 15;236(1):85-92.
- 593 Constantz J. Interaction between stream temperature, streamflow, and groundwater exchanges in  
594 alpine streams. *Water resources research*. 1998 Jul;34(7):1609-15.
- 595 Cook RA, Gawne B, Petrie R, Baldwin DS, Rees GN, Nielsen DL, Ning NS. River metabolism  
596 and carbon dynamics in response to flooding in a lowland river. *Marine and Freshwater  
597 Research*. 2015 Oct 19;66(10):919-27.
- 598 Dasmann RF. A system for defining and classifying natural regions for purposes of conservation.  
599 A progress report. UICN, Morges (Suiza); 1973.
- 600 Demars BO. Hydrological pulses and burning of dissolved organic carbon by stream respiration.  
601 *Limnology and Oceanography*. 2019 Jan;64(1):406-21.
- 602 Detenbeck NE, DeVore PW, Niemi GJ, Lima A. Recovery of temperate-stream fish communities  
603 from disturbance: a review of case studies and synthesis of theory. *Environmental  
604 management*. 1992 Jan 1;16(1):33.
- 605 Dodd, AK, Pollock, ED, and Evans-White MA. Quantifying flow sources and their impact on  
606 water quality in Ozark streams. 2020; *Arkansas Bulletin of Water Research* 2020: 18-23.
- 607 Dodds WK, Hutson RE, Eiche AC, Evans MA, Gudder DA, Fritz KM, Gray L. The  
608 relationship of floods, drying, flow and light to primary production and producer biomass in  
609 a prairie stream. *Hydrobiologia*. 1996 Oct 1;333(3):151-9.
- 610 Dodds WK, Higgs SA, Spangler MJ, Guinnip J, Scott JD, Hedden SC, Frenette BD, Taylor R,  
611 Schechner AE, Hoehinghaus DJ, Evans-White MA. Spatial heterogeneity and controls of  
612 ecosystem metabolism in a Great Plains river network. *Hydrobiologia*. 2018 May  
613 1;813(1):85-102.

- 614 Dole-Olivier MJ. The hyporheic refuge hypothesis reconsidered: a review of hydrological  
615 aspects. *Marine and Freshwater Research*. 2011 Nov 23;62(11):1281-302.
- 616 Dugan PJ, Barlow C, Agostinho AA, Baran E, Cada GF, Chen D, Cowx IG, Ferguson JW,  
617 Jutagate T, Mallen-Cooper M, Marmulla G. Fish migration, dams, and loss of ecosystem  
618 services in the Mekong basin. *Ambio*. 2010 Jun 1;39(4):344-8.
- 619 Eaton AD, Franson MA. American Public Health Association (APHA) (2005) Standard Methods  
620 for the Examination of Water & Wastewater. American Public Health Association,  
621 American Water Works Association, Water Environment Federation, USA, Washington.  
622 2005.
- 623 Elser JJ, Bracken ME, Cleland EE, Gruner DS, Harpole WS, Hillebrand H, Ngai JT, Seabloom  
624 EW, Shurin JB, Smith JE. Global analysis of nitrogen and phosphorus limitation of primary  
625 producers in freshwater, marine and terrestrial ecosystems. *Ecology letters*. 2007  
626 Dec;10(12):1135-42.
- 627 Fisher SG, Gray LJ, Grimm NB, Busch DE. Temporal succession in a desert stream ecosystem  
628 following flash flooding. *Ecological monographs*. 1982 Feb;52(1):93-110.
- 629 Genzoli L, Hall Jr RO. Shifts in Klamath River metabolism following a reservoir cyanobacterial  
630 bloom. *Freshwater Science*. 2016 Sep 1;35(3):795-809.
- 631 Gore JA, Banning J. Discharge measurements and streamflow analysis. In *Methods in Stream  
632 Ecology*, Volume 1 2017 Jan 1 (pp. 49-70). Academic Press.
- 633 Grimm, NB and Fisher SG. Stability of periphyton and macroinvertebrates to disturbance by  
634 flash floods in a desert stream. 1989. *J N Am Benthol Soc* 8: 293–307.
- 635 Hall Jr RO, Tank JL. Correcting whole-stream estimates of metabolism for groundwater input.  
636 *Limnology and Oceanography: Methods*. 2005 Apr;3(4):222-9.
- 637 Hall Jr RO, Hotchkiss ER. Stream metabolism. In *Methods in stream ecology* 2017 Jan 1 (pp.  
638 219-233). Academic Press.
- 639 Hill BH, Hall RK, Husby P, Herlihy AT, Dunne M. Interregional comparisons of sediment  
640 microbial respiration in streams. *Freshwater Biology*. 2000 Jun 1;44(2):213-22.
- 641 Hornbach DJ, Beckel R, Hustad EN, McAdam DP, Roen IM, Wareham AJ. The influence of  
642 riparian vegetation and season on stream metabolism of Valley Creek, Minnesota. *Journal  
643 of Freshwater Ecology*. 2015 Oct 2;30(4):569-88.
- 644 Hotchkiss ER, Sadro S, Hanson PC. Toward a more integrative perspective on carbon  
645 metabolism across lentic and lotic inland waters. *Limnology and Oceanography Letters*.  
646 2018 Jun 1;3(3):57-63.

- 647 Humphrey KP, Stevenson RJ. Responses of benthic algae to pulses in current and nutrients  
648 during simulations of subscouring spates. *Journal of the North American Benthological*  
649 *Society*. 1992 Mar 1;11(1):37-48.
- 650 Humphries P, Baldwin DS. Drought and aquatic ecosystems: an introduction. *Freshwater*  
651 *Biology*. 2003 Jul;48(7):1141-6.
- 652 Huryn AD, Wallace JB. Life history and production of stream insects. *Annual review of*  
653 *entomology*. 2000 Jan;45(1):83-110.
- 654 Hynes HB. The stream and its valley: With 4 figures and 2 tables in the text. *Internationale*  
655 *Vereinigung für theoretische und angewandte Limnologie: Verhandlungen*. 1975 Oct  
656 1;19(1):1-5.
- 657 Izagirre O, Agirre U, Bermejo M, Pozo J, Elozegi A. Environmental controls of whole-stream  
658 metabolism identified from continuous monitoring of Basque streams. *Journal of the North*  
659 *American Benthological Society*. 2008 Jun;27(2):252-68.
- 660 Jones JA, Swanson FJ, Wemple BC, Snyder KU. Effects of roads on hydrology, geomorphology,  
661 and disturbance patches in stream networks. *Conservation Biology*. 2000 Feb;14(1):76-  
662 85.
- 663  
664 Jones Jr JB, Fisher SG, Grimm NB. Vertical hydrologic exchange and ecosystem metabolism in  
665 a Sonoran Desert stream. *Ecology*. 1995 Apr;76(3):942-52.
- 666
- 667 Koenig LE, Helton AM, Savoy P, Bertuzzo E, Heffernan JB, Hall Jr RO, Bernhardt ES.  
668 Emergent productivity regimes of river networks. *Limnology and Oceanography Letters*.  
669 2019 Oct;4(5):173-81. Lajoie F, Assani AA, Roy AG, Mesfioui M. Impacts of dams on  
670 monthly flow characteristics. The influence of watershed size and seasons. *Journal of*  
671 *hydrology*. 2007 Feb 28;334(3-4):423-39.
- 672 Lamberti GA, Steinman AD. A comparison of primary production in stream ecosystems. *Journal*  
673 *of the North American Benthological Society*. 1997 Mar 1;16(1):95-104.
- 674 Leasure DR, Magoulick DD, Longing SD. Natural flow regimes of the Ozark–Ouachita interior  
675 highlands region. *River Research and Applications*. 2016 Jan;32(1):18-35.
- 676 Ligon FK, Dietrich WE, Trush WJ. Downstream ecological effects of dams. *BioScience*. 1995  
677 Mar 1;45(3):183-92.
- 678 Lytle DA, Poff NL. Adaptation to natural flow regimes. *Trends in ecology & evolution*. 2004  
679 Feb 1;19(2):94-100.
- 680 McCormick PV. Resource competition and species coexistence in freshwater benthic algal  
681 assemblages. In *Algal ecology* 1996 Jan 1 (pp. 229-252). Academic Press.

- 682 Mejia FH, Fremier AK, Benjamin JR, Bellmore JR, Grimm AZ, Watson GA, Newsom M.  
683 Stream metabolism increases with drainage area and peaks asynchronously across a stream  
684 network. *Aquatic Sciences*. 2019 Jan 1;81(1):9.
- 685 Morin A, Lamoureux W, Busnarda J. Empirical models predicting primary productivity from  
686 chlorophyll a and water temperature for stream periphyton and lake and ocean  
687 phytoplankton. *Journal of the North American Benthological Society*. 1999 Sep  
688 1;18(3):299-307.
- 689 Mulholland PJ, Marzolf ER, Webster JR, Hart DR, Hendricks SP. Evidence that hyporheic zones  
690 increase heterotrophic metabolism and phosphorus uptake in forest streams. *Limnology and  
691 oceanography*. 1997 May;42(3):443-51.
- 692 Mulholland PJ, Fellows CS, Tank JL, Grimm NB, Webster JR, Hamilton SK, Martí E, Ashkenas  
693 L, Bowden WB, Dodds WK, McDowell WH. Inter-biome comparison of factors controlling  
694 stream metabolism. *Freshwater biology*. 2001 Nov 1;46(11):1503-17.
- 695 Mulholland PJ, Helton AM, Poole GC, Hall RO, Hamilton SK, Peterson BJ, Tank JL, Ashkenas  
696 LR, Cooper LW, Dahm CN, Dodds WK. Stream denitrification across biomes and its  
697 response to anthropogenic nitrate loading. *Nature*. 2008 Mar;452(7184):202-5.
- 698 Munn MD, Sheibley RW, Waite IR, Meador MR. Understanding the relationship between stream  
699 metabolism and biological assemblages. *Freshwater Science*. 2020 Dec 1;39(4):680-92.
- 700 Naiman RJ. The annual pattern and spatial distribution of aquatic oxygen metabolism in boreal  
701 forest watersheds. *Ecological monographs*. 1983 Feb;53(1):73-94.
- 702 Odum HT. Primary production in flowing waters 1. *Limnology and oceanography*. 1956  
703 Apr;1(2):102-17.
- 704 O'Donnell B, Hotchkiss ER. Coupling Concentration-and Process-Discharge Relationships  
705 Integrates Water Chemistry and Metabolism in Streams. *Water Resources Research*. 2019  
706 Dec;55(12):10179-90.
- 707 Palmer M, Ruhi A. Linkages between flow regime, biota, and ecosystem processes: Implications  
708 for river restoration. *Science*. 2019 Sep 20;365(6459):eaaw2087.
- 709 Paul MJ, Meyer JL. Streams in the urban landscape. *Annual review of Ecology and Systematics*.  
710 2001 Nov;32(1):333-65.
- 711 Peckarsky BL, McIntosh AR, Álvarez M, Moslemi JM. Disturbance legacies and nutrient  
712 limitation influence interactions between grazers and algae in high elevation streams.  
713 *Ecosphere*. 2015 Nov;6(11):1-5.

- 714 Poff NL, Ward JV. Implications of streamflow variability and predictability for lotic community  
715 structure: a regional analysis of streamflow patterns. *Canadian journal of fisheries and*  
716 *aquatic sciences*. 1989 Oct 1;46(10):1805-18.
- 717 Poff NL, Ward JV. Physical habitat template of lotic systems: recovery in the context of  
718 historical pattern of spatiotemporal heterogeneity. *Environmental management*. 1990 Sep  
719 1;14(5):629.
- 720 Poff NL, Allan JD, Bain MB, Karr JR, Prestegard KL, Richter BD, Sparks RE, Stromberg JC.  
721 The natural flow regime. *BioScience*. 1997 Dec 1;47(11):769-84.
- 722 Poff NL, Bledsoe BP, Cuhaciyan CO. Hydrologic variation with land use across the contiguous  
723 United States: geomorphic and ecological consequences for stream ecosystems.  
724 *Geomorphology*. 2006 Sep 30;79(3-4):264-85.
- 725 Poff NL, Richter BD, Arthington AH, Bunn SE, Naiman RJ, Kendy E, Acreman M, Apse C,  
726 Bledsoe BP, Freeman MC, Henriksen J. The ecological limits of hydrologic alteration  
727 (ELOHA): a new framework for developing regional environmental flow standards.  
728 *Freshwater Biology*. 2010 Jan;55(1):147-70.
- 729 Poff NL, Zimmerman JK. Ecological responses to altered flow regimes: a literature review to  
730 inform the science and management of environmental flows. *Freshwater Biology*. 2010  
731 Jan;55(1):194-205.
- 732 Qasem K, Vitousek S, O'Connor B, Hoellein T. The effect of floods on ecosystem metabolism in  
733 suburban streams. *Freshwater Science*. 2019 Jun 1;38(2):412-24.
- 734 Reisinger AJ, Rosi EJ, Bechtold HA, Doody TR, Kaushal SS, Groffman PM. Recovery and  
735 resilience of urban stream metabolism following Superstorm Sandy and other floods.  
736 *Ecosphere*. 2017 Apr;8(4):e01776.
- 737 Richter BD. Re-thinking environmental flows: from allocations and reserves to sustainability  
738 boundaries. *River Research and Applications*. 2010 Oct;26(8):1052-63.
- 739 Riley AJ, Dodds WK. Whole-stream metabolism: strategies for measuring and modeling diel  
740 trends of dissolved oxygen. *Freshwater Science*. 2013 Mar;32(1):56-69.
- 741 Roberts BJ, Mulholland PJ, Hill WR. Multiple scales of temporal variability in ecosystem  
742 metabolism rates: results from 2 years of continuous monitoring in a forested headwater  
743 stream. *Ecosystems*. 2007 Jun 1;10(4):588-606.
- 744 Roley SS, Tank JL, Griffiths NA, Hall Jr RO, Davis RT. The influence of floodplain restoration  
745 on whole-stream metabolism in an agricultural stream: insights from a 5-year continuous  
746 data set. *Freshwater Science*. 2014 Dec 1;33(4):1043-59.



- 747 Rovelli L, Attard KM, Binley A, Heppell CM, Stahl H, Trimmer M, Glud RN. Reach-scale river  
748 metabolism across contrasting sub-catchment geologies: Effect of light and hydrology.  
749 *Limnology and oceanography*. 2017 Nov;62(S1):S381-99.
- 750 Sauer VB, Thomas Jr WO, Stricker VA, Wilson KV. Flood characteristics of urban watersheds  
751 in the United States. USGPO,; 1983.
- 752 Savoy P, Appling AP, Heffernan JB, Stets EG, Read JS, Harvey JW, Bernhardt ES. Metabolic  
753 rhythms in flowing waters: An approach for classifying river productivity regimes.  
754 *Limnology and Oceanography*. 2019 Sep;64(5):1835-51.
- 755 Sinsabaugh RL. Large-scale trends for stream benthic respiration. *Journal of the North American*  
756 *Benthological Society*. 1997 Mar 1;16(1):119-22.
- 757 Southwood TR. Habitat, the templet for ecological strategies? *Journal of animal ecology*. 1977  
758 Jun 1;46(2):337-65.
- 759 Steinman AD, Lamberti GA, Leavitt PR, Uzarski DG. Biomass and pigments of benthic algae. In  
760 *Methods in Stream Ecology, Volume 1* 2017 Jan 1 (pp. 223-241). Academic Press.
- 761 Stephenson SL, Adams HS, Huebner CD. Upland forest vegetation of the Ozark Mountains in  
762 northwestern Arkansas. *Rhodora*. 2007 Jun;109(938):197-221.
- 763 Stevenson RJ. Benthic algal community dynamics in a stream during and after a spate. *Journal of*  
764 *the North American Benthological Society*. 1990 Sep 1;9(3):277-88.
- 765 Stroud Water Research Center. Model My Watershed [Software]. 2017. Available from  
766 <https://wikiwatershed.org/>
- 767 Stubbington R. The hyporheic zone as an invertebrate refuge: a review of variability in space,  
768 time, taxa and behaviour. *Marine and Freshwater Research*. 2012 Apr 24;63(4):293-311.
- 769 Sumner WT, Fisher SG. Periphyton production in Fort River, Massachusetts. *Freshwater*  
770 *Biology*. 1979 Jun;9(3):205-12.
- 771 Thoms MC, Parsons M. Eco-geomorphology: an interdisciplinary approach to river science.  
772 *International Association of Hydrological Sciences, Publication*. 2002 Sep;276:113-9p.
- 773 Uehlinger U. Resistance and resilience of ecosystem metabolism in a flood-prone river system.  
774 *Freshwater Biology*. 2000 Nov;45(3):319-32.
- 775 Uehlinger U, Kawecka B, Robinson CT. Effects of experimental floods on periphyton and  
776 stream metabolism below a high dam in the Swiss Alps (River Spöl). *Aquatic Sciences*.  
777 2003 Sep 1;65(3):199-209.

- 778 Uehlinger U. Annual cycle and inter-annual variability of gross primary production and  
779 ecosystem respiration in a floodprone river during a 15-year period. *Freshwater Biology*.  
780 2006 May;51(5):938-50.
- 781 Vilches C, Giorgi A. Metabolism in a macrophyte-rich stream exposed to flooding.  
782 *Hydrobiologia*. 2010 Oct 1;654(1):57-65.
- 783 Walsh CJ, Roy AH, Feminella JW, Cottingham PD, Groffman PM, Morgan RP. The urban  
784 stream syndrome: current knowledge and the search for a cure. *Journal of the North  
785 American Benthological Society*. 2005 Sep;24(3):706-23.
- 786 Webster JR, Wallace JB, Benfield EF. Organic processes in streams of the eastern United States.  
787 *River stream Ecosyst. world*. 1995:117-87.
- 788 Williamson CE, Dodds W, Kratz TK, Palmer MA. Lakes and streams as sentinels of  
789 environmental change in terrestrial and atmospheric processes. *Frontiers in Ecology and the  
790 Environment*. 2008 Jun;6(5):247-54.
- 791 Woods AJ. *Ecoregions of Arkansas*. US Geological Survey; 2004.
- 792 Yates AG, Brua RB, Culp JM, Chambers PA. Multi-scaled drivers of rural prairie stream  
793 metabolism along human activity gradients. *Freshwater Biology*. 2013 Apr;58(4):675-89.
- 794 Young RG, Huryn AD. Effects of land use on stream metabolism and organic matter turnover.  
795 *Ecological Applications*. 1999 Nov;9(4):1359-76.
- 796  
797



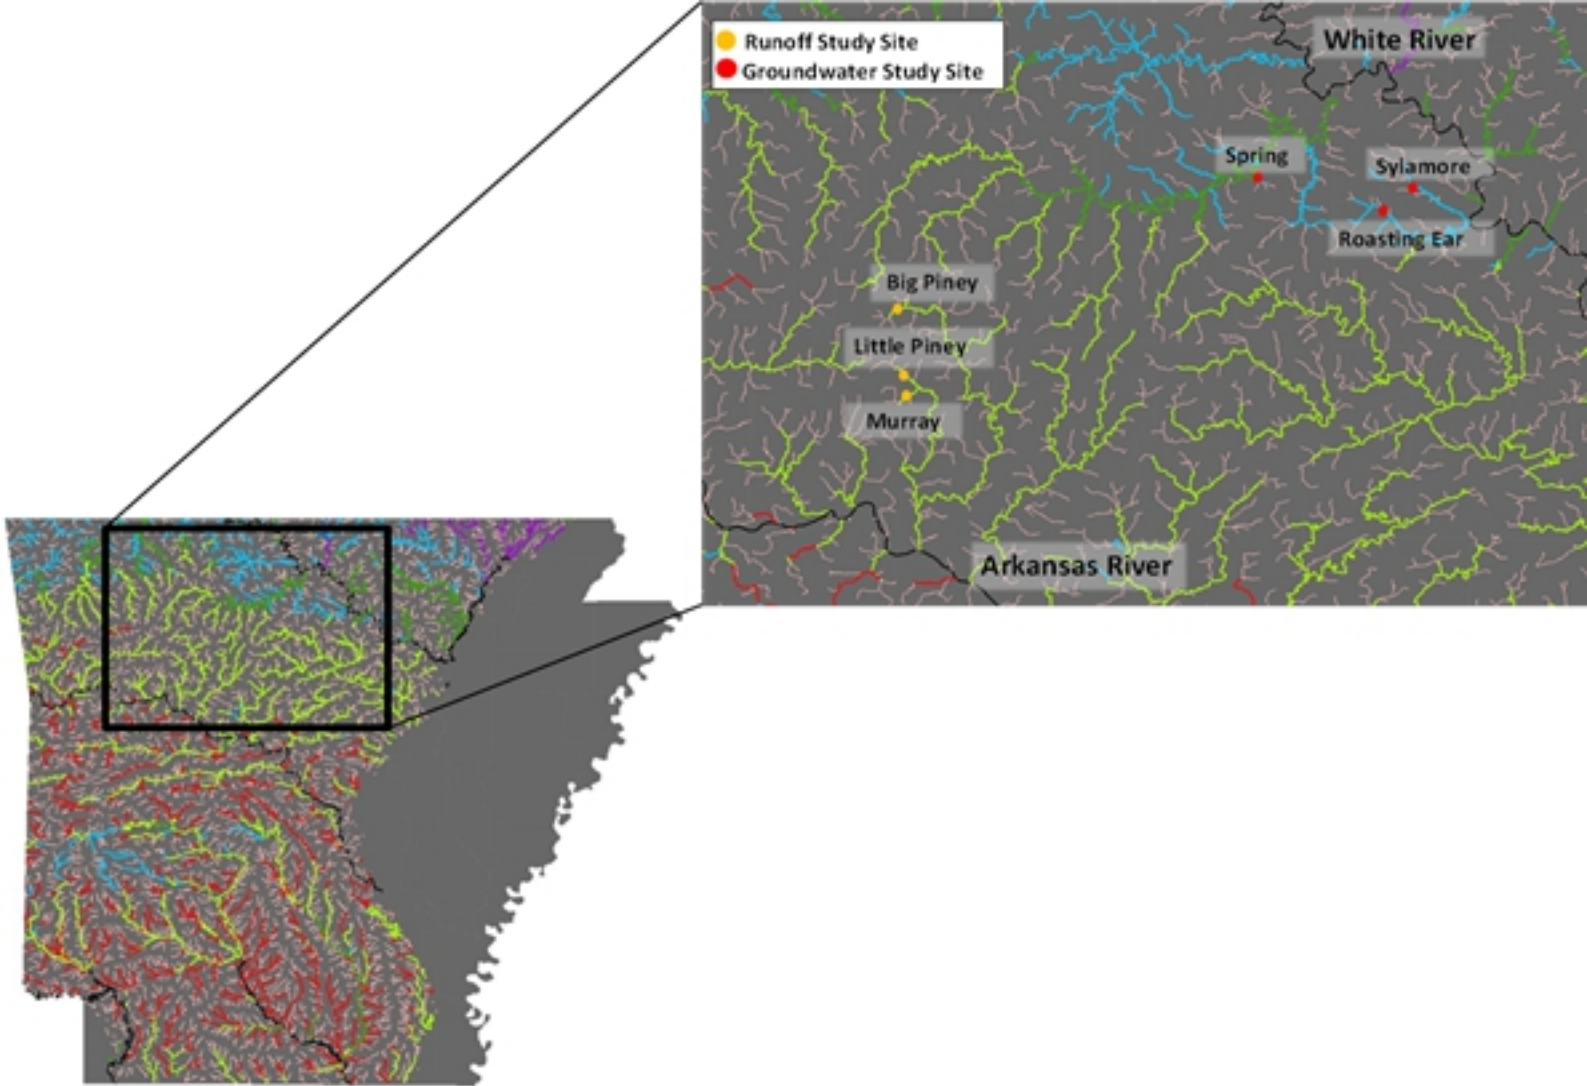

Figure 2

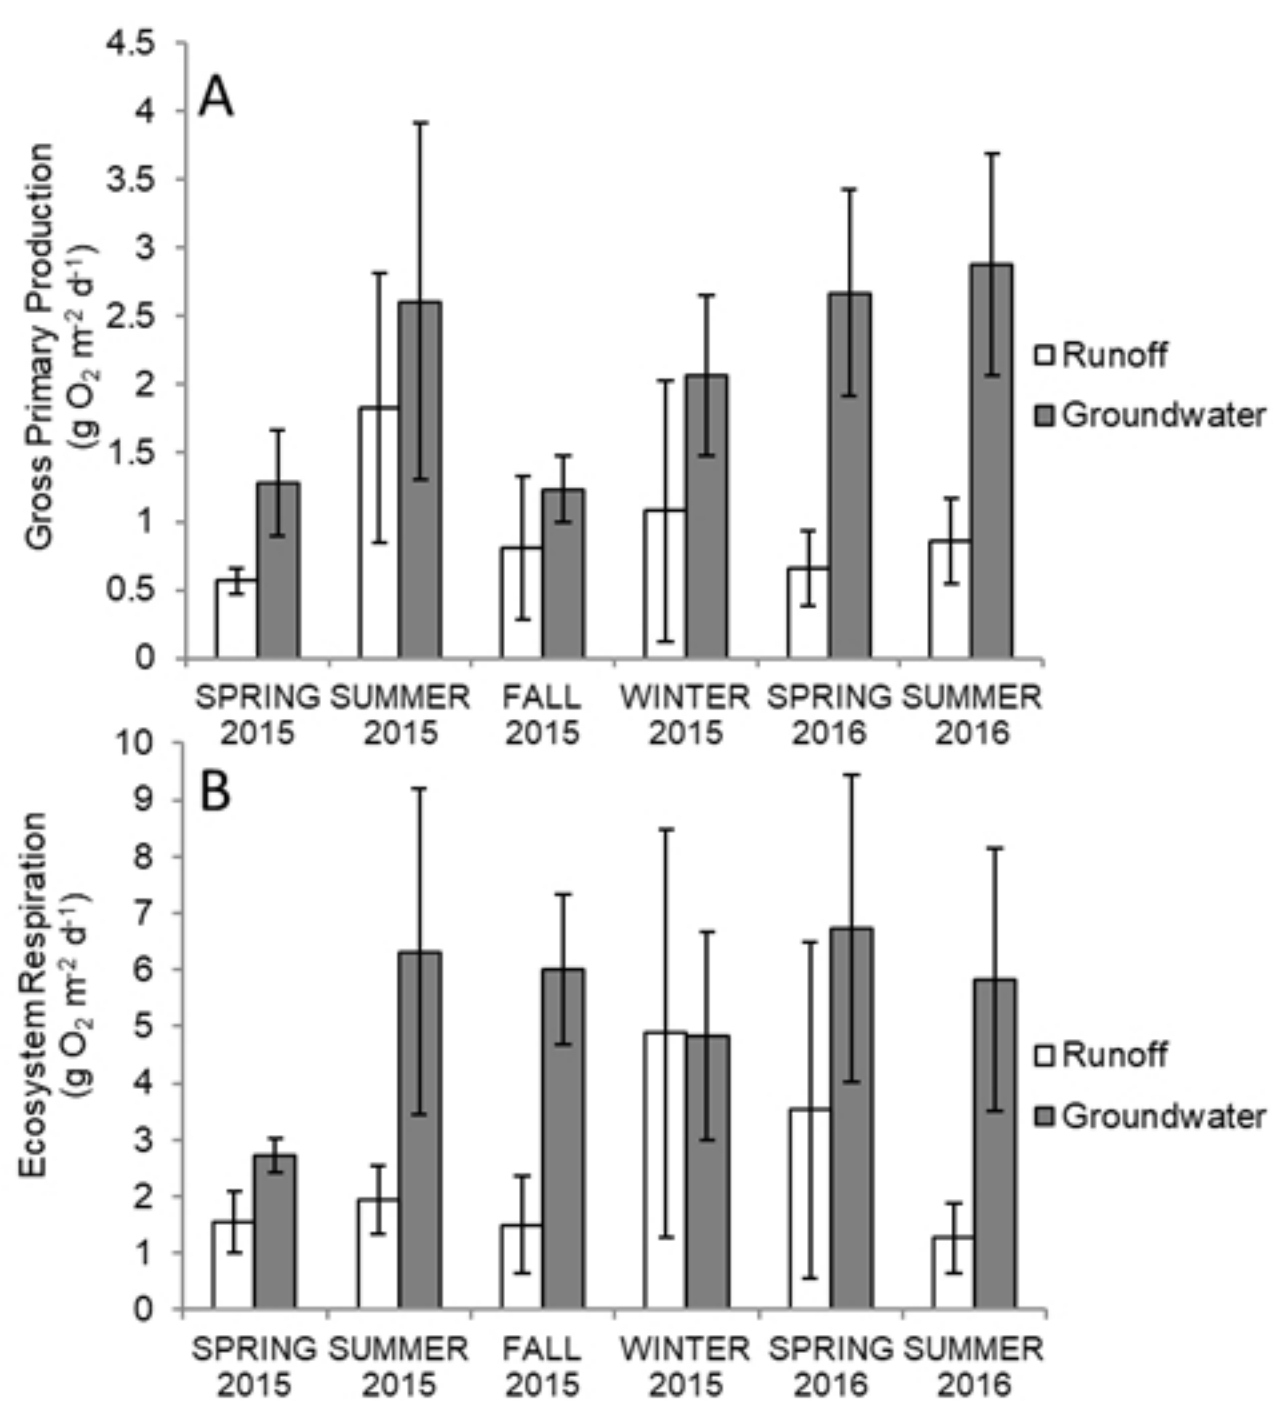

Figure 3

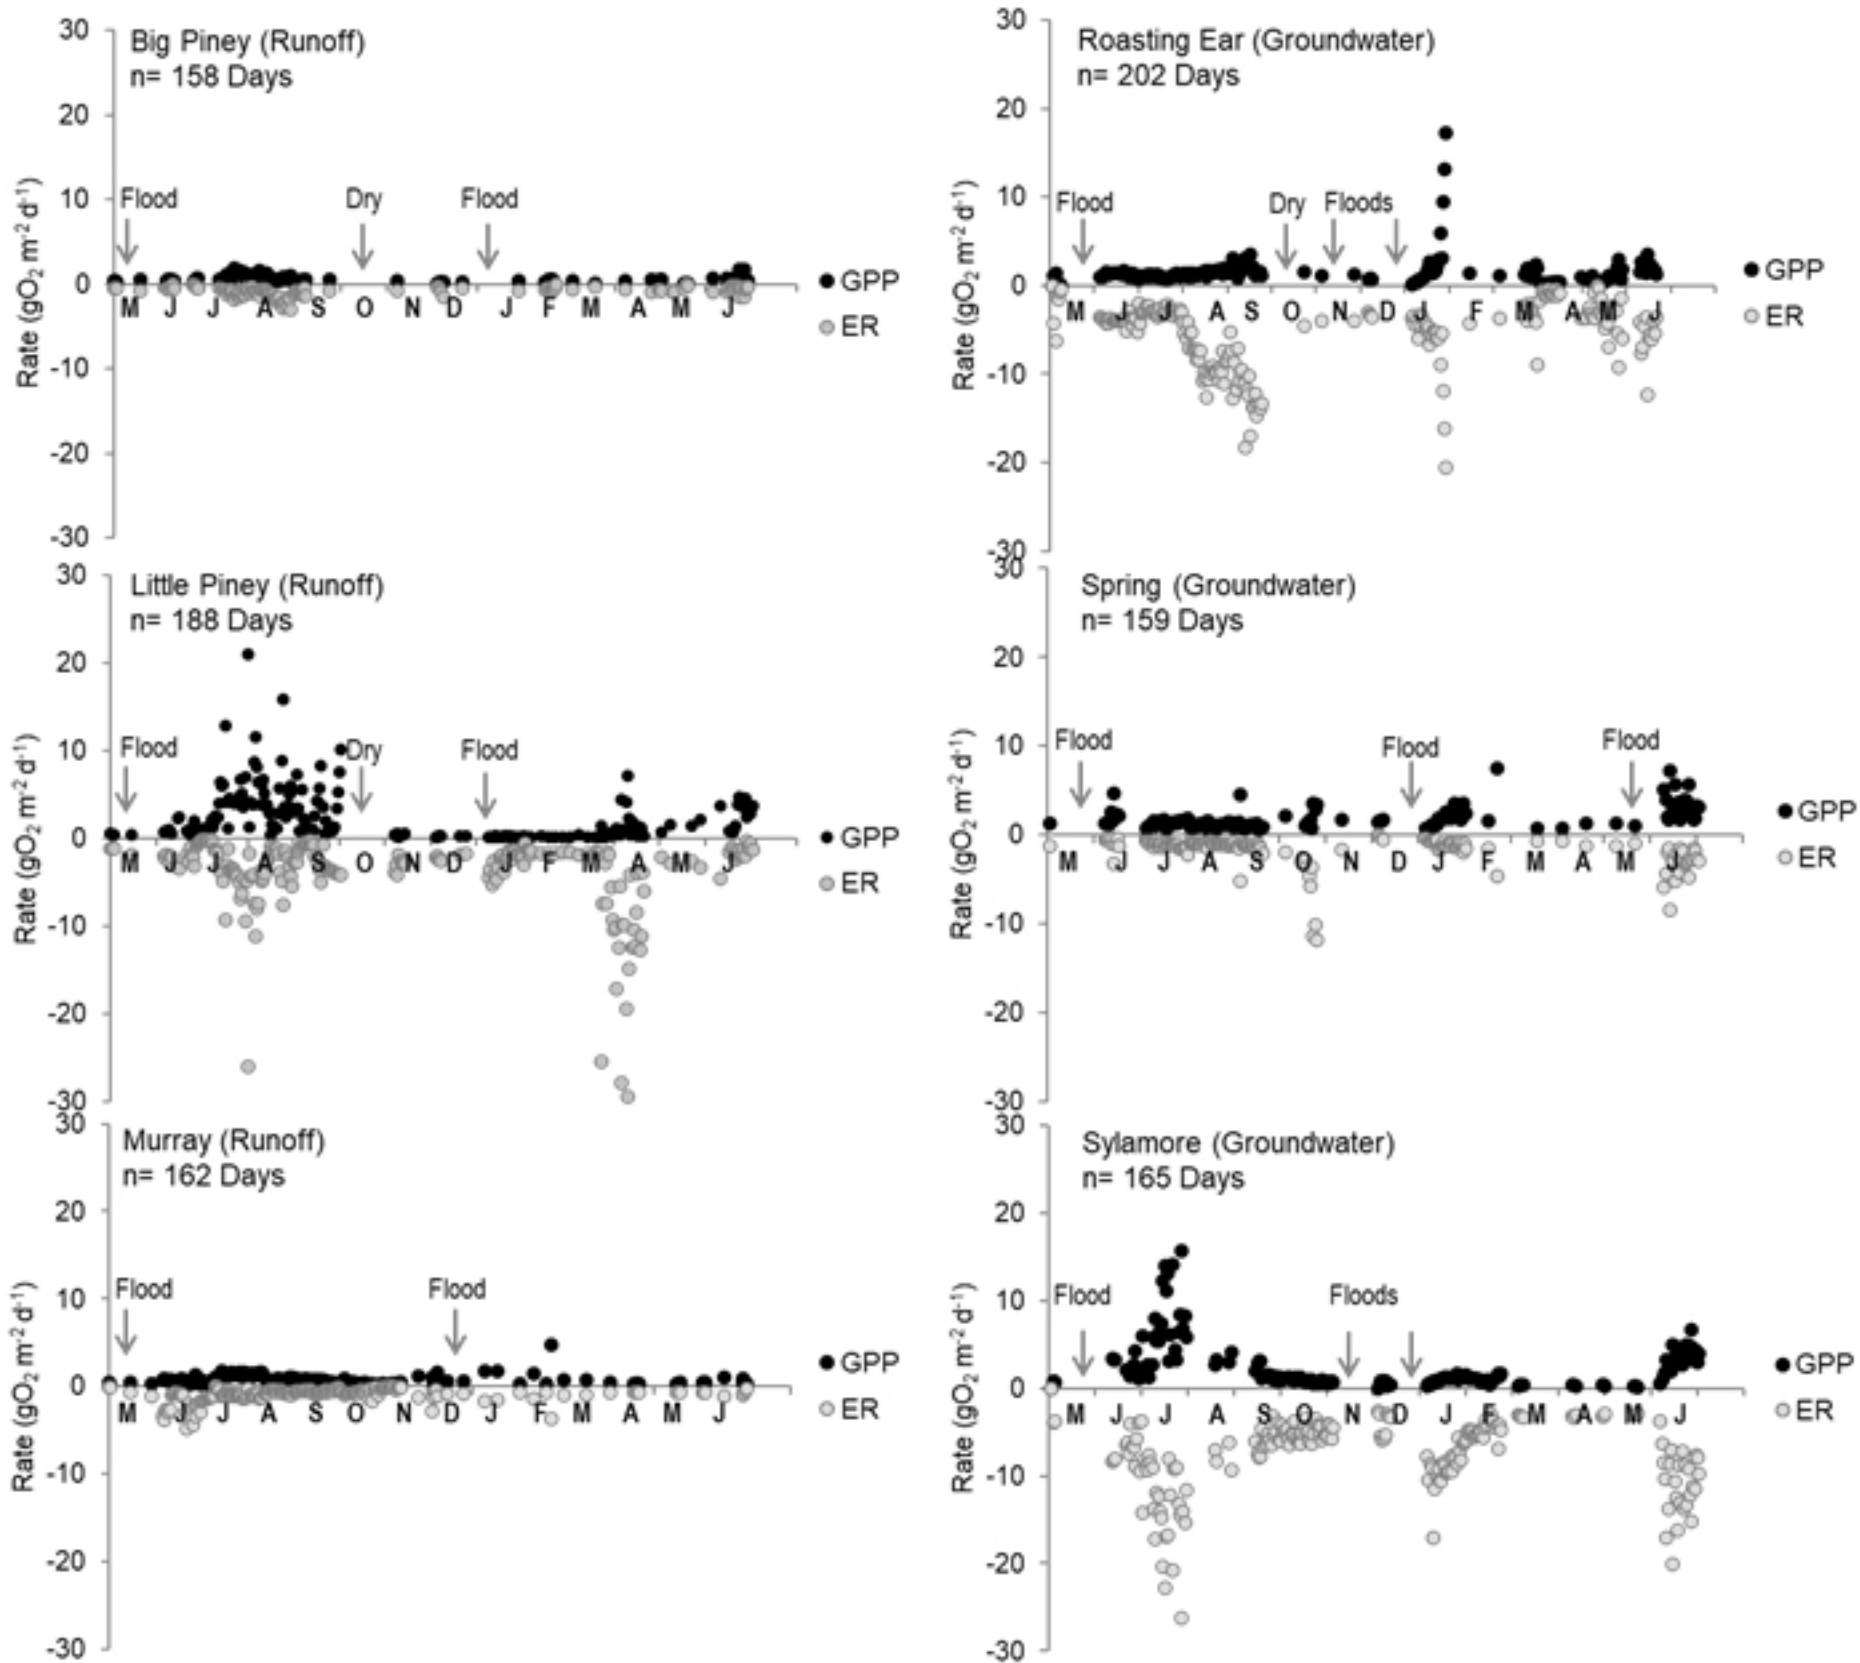

Figure 4

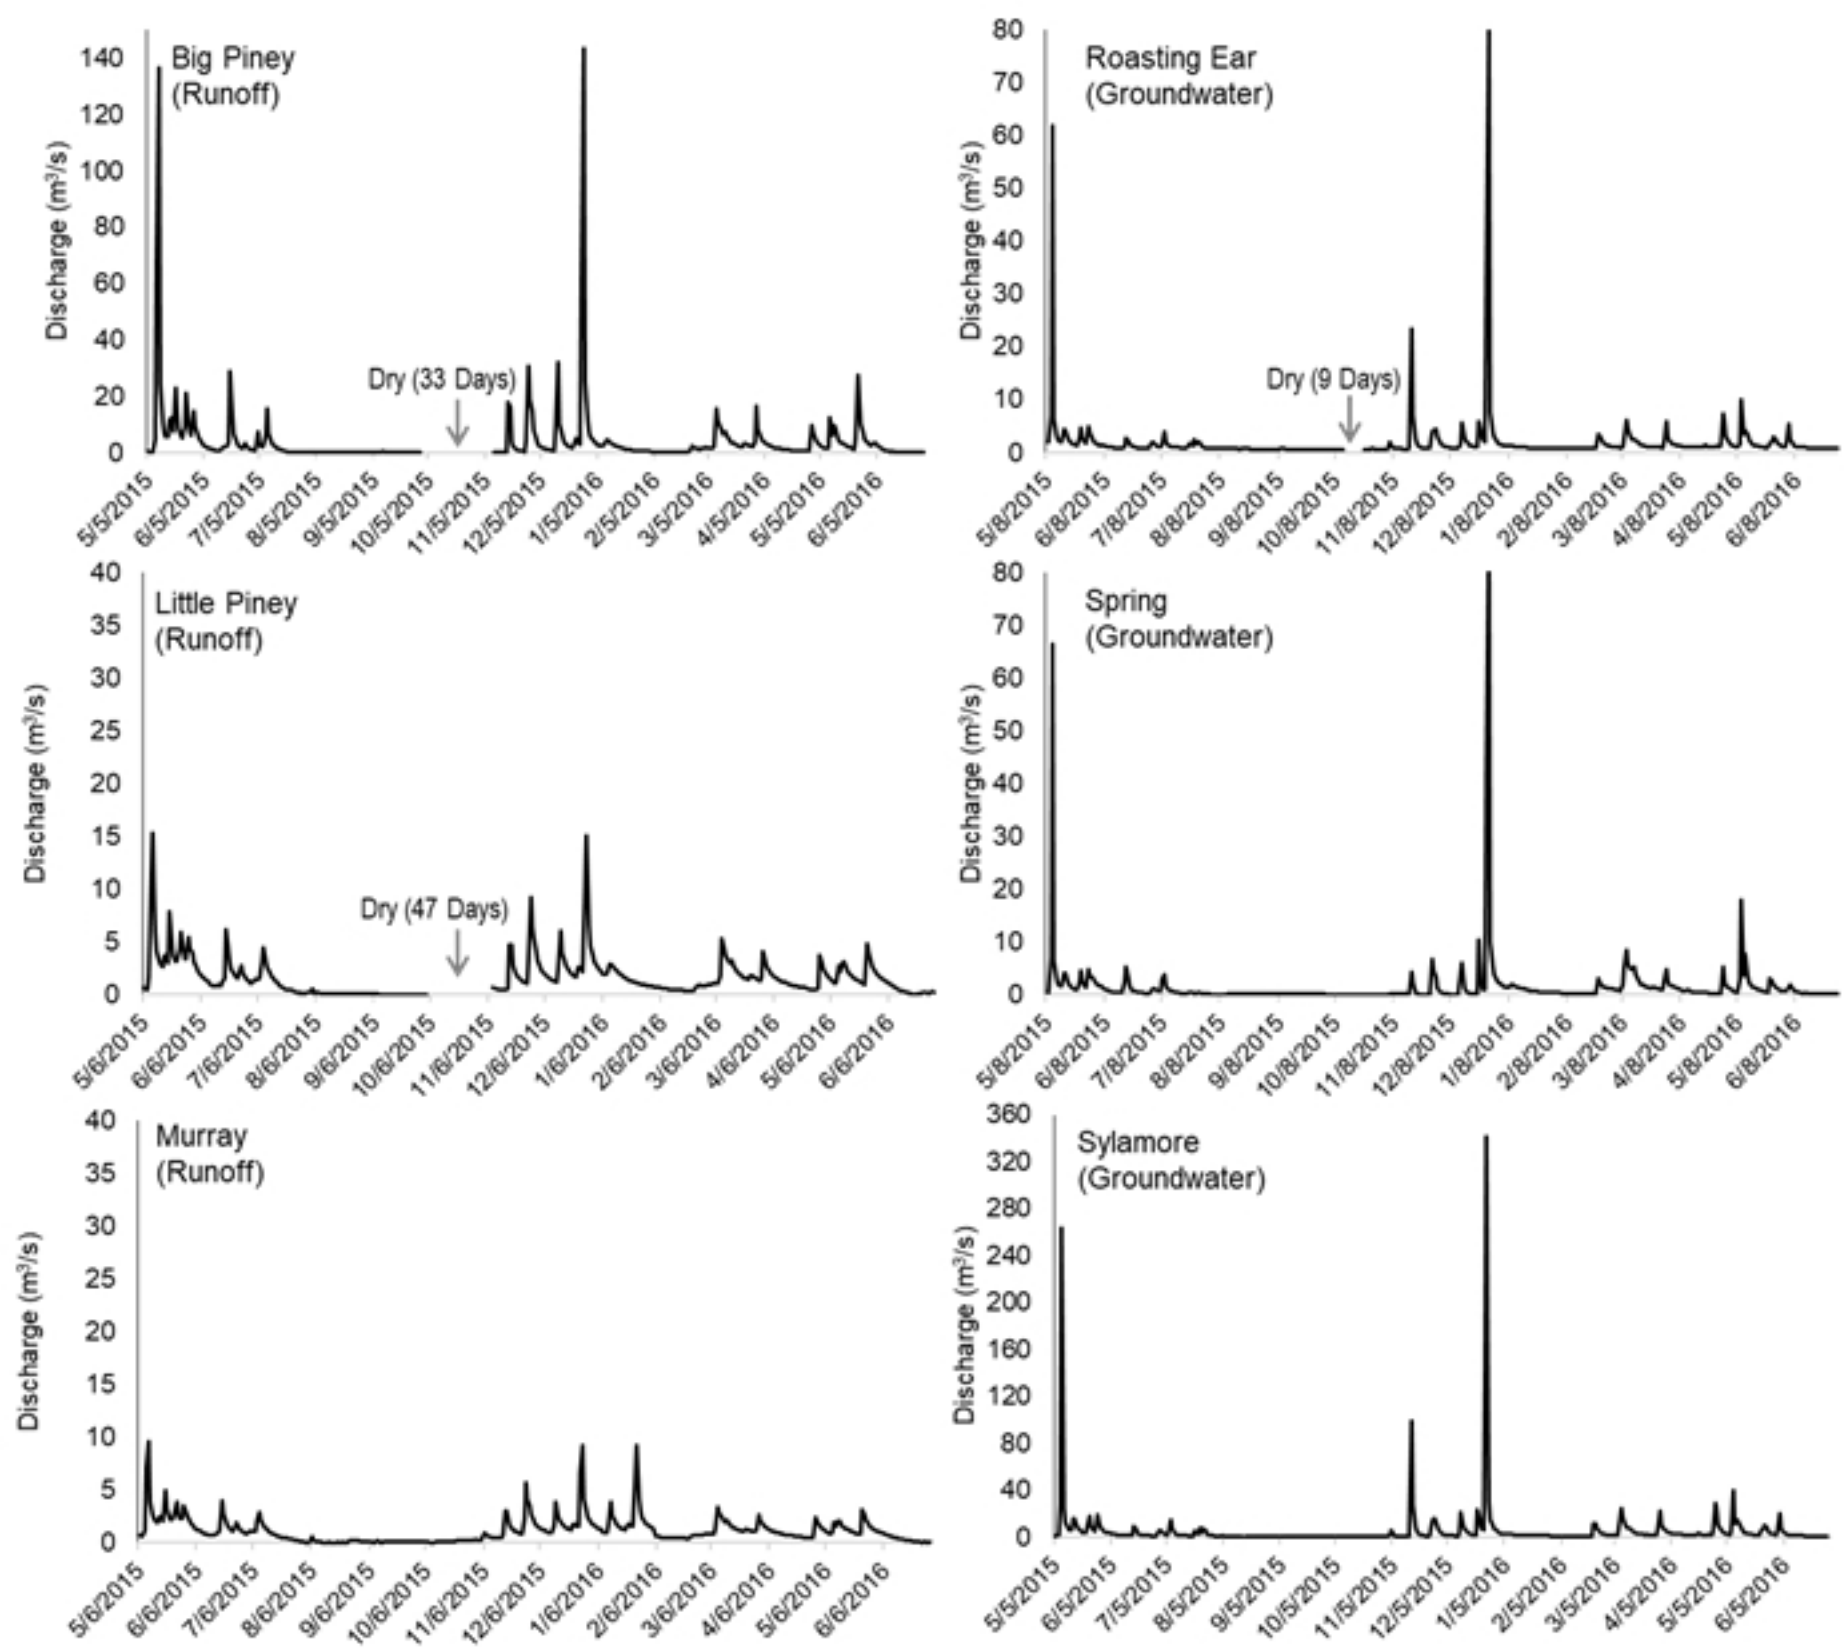

Figure 5

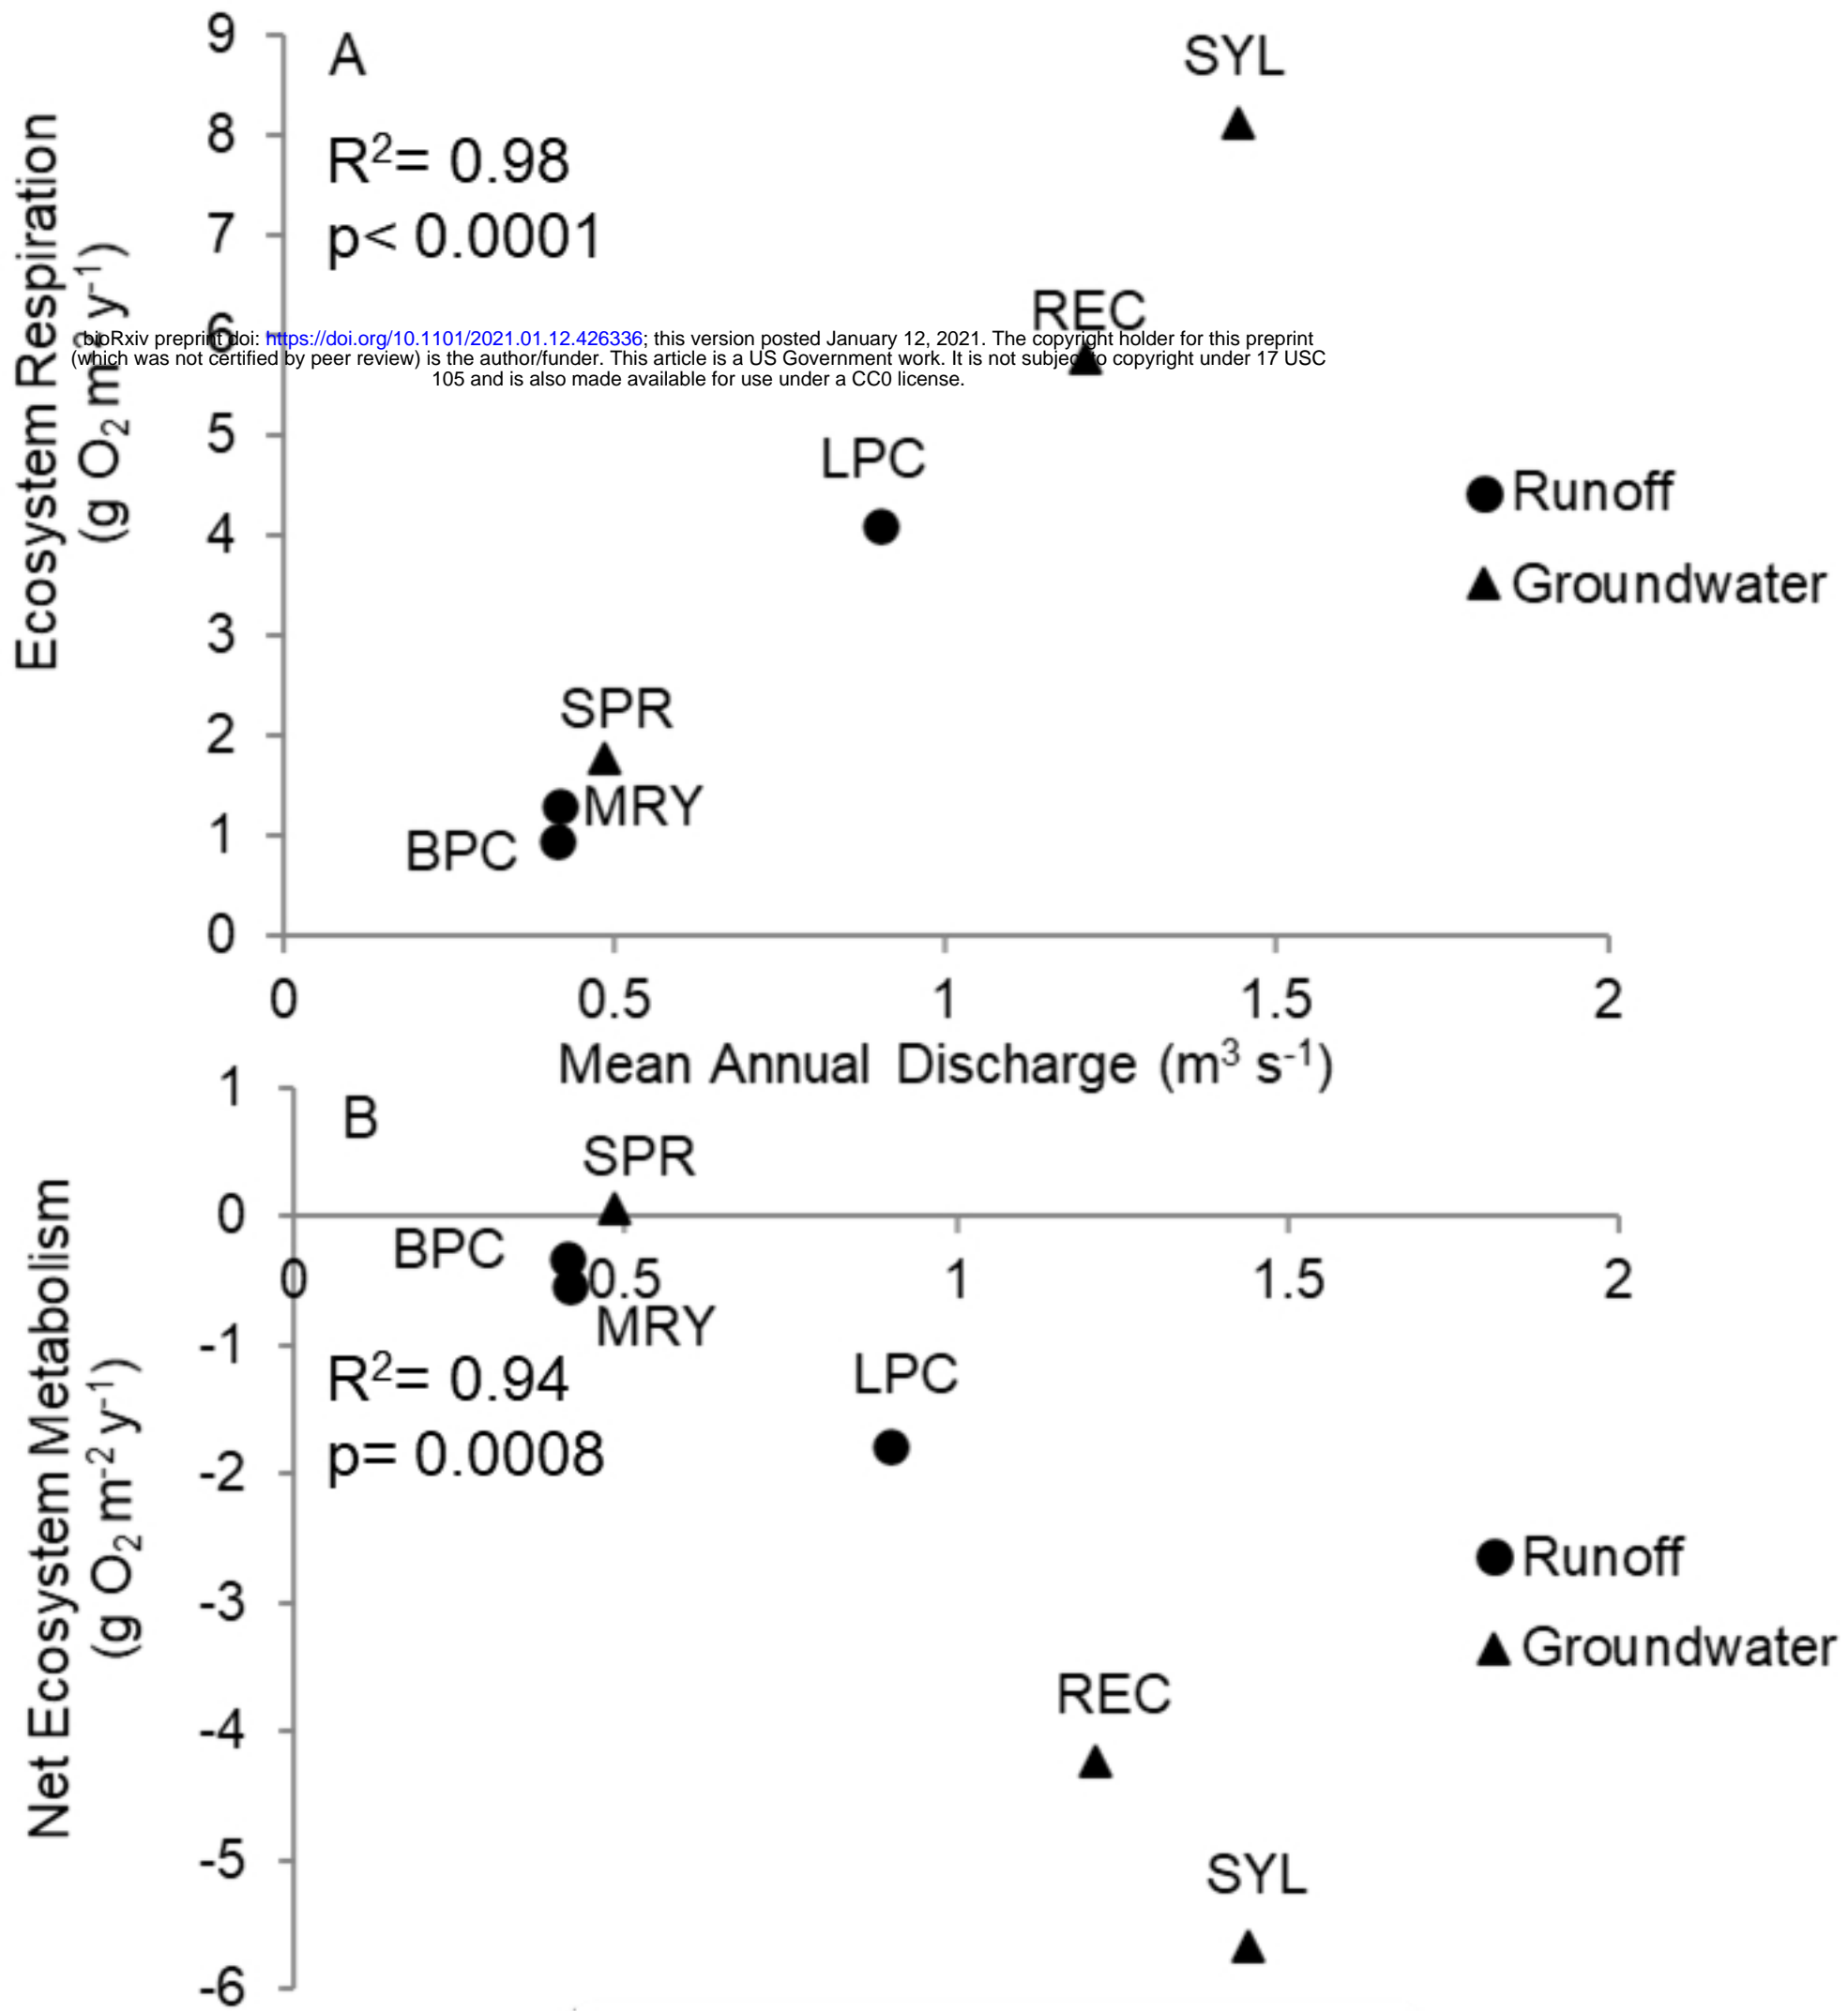

Figure 6

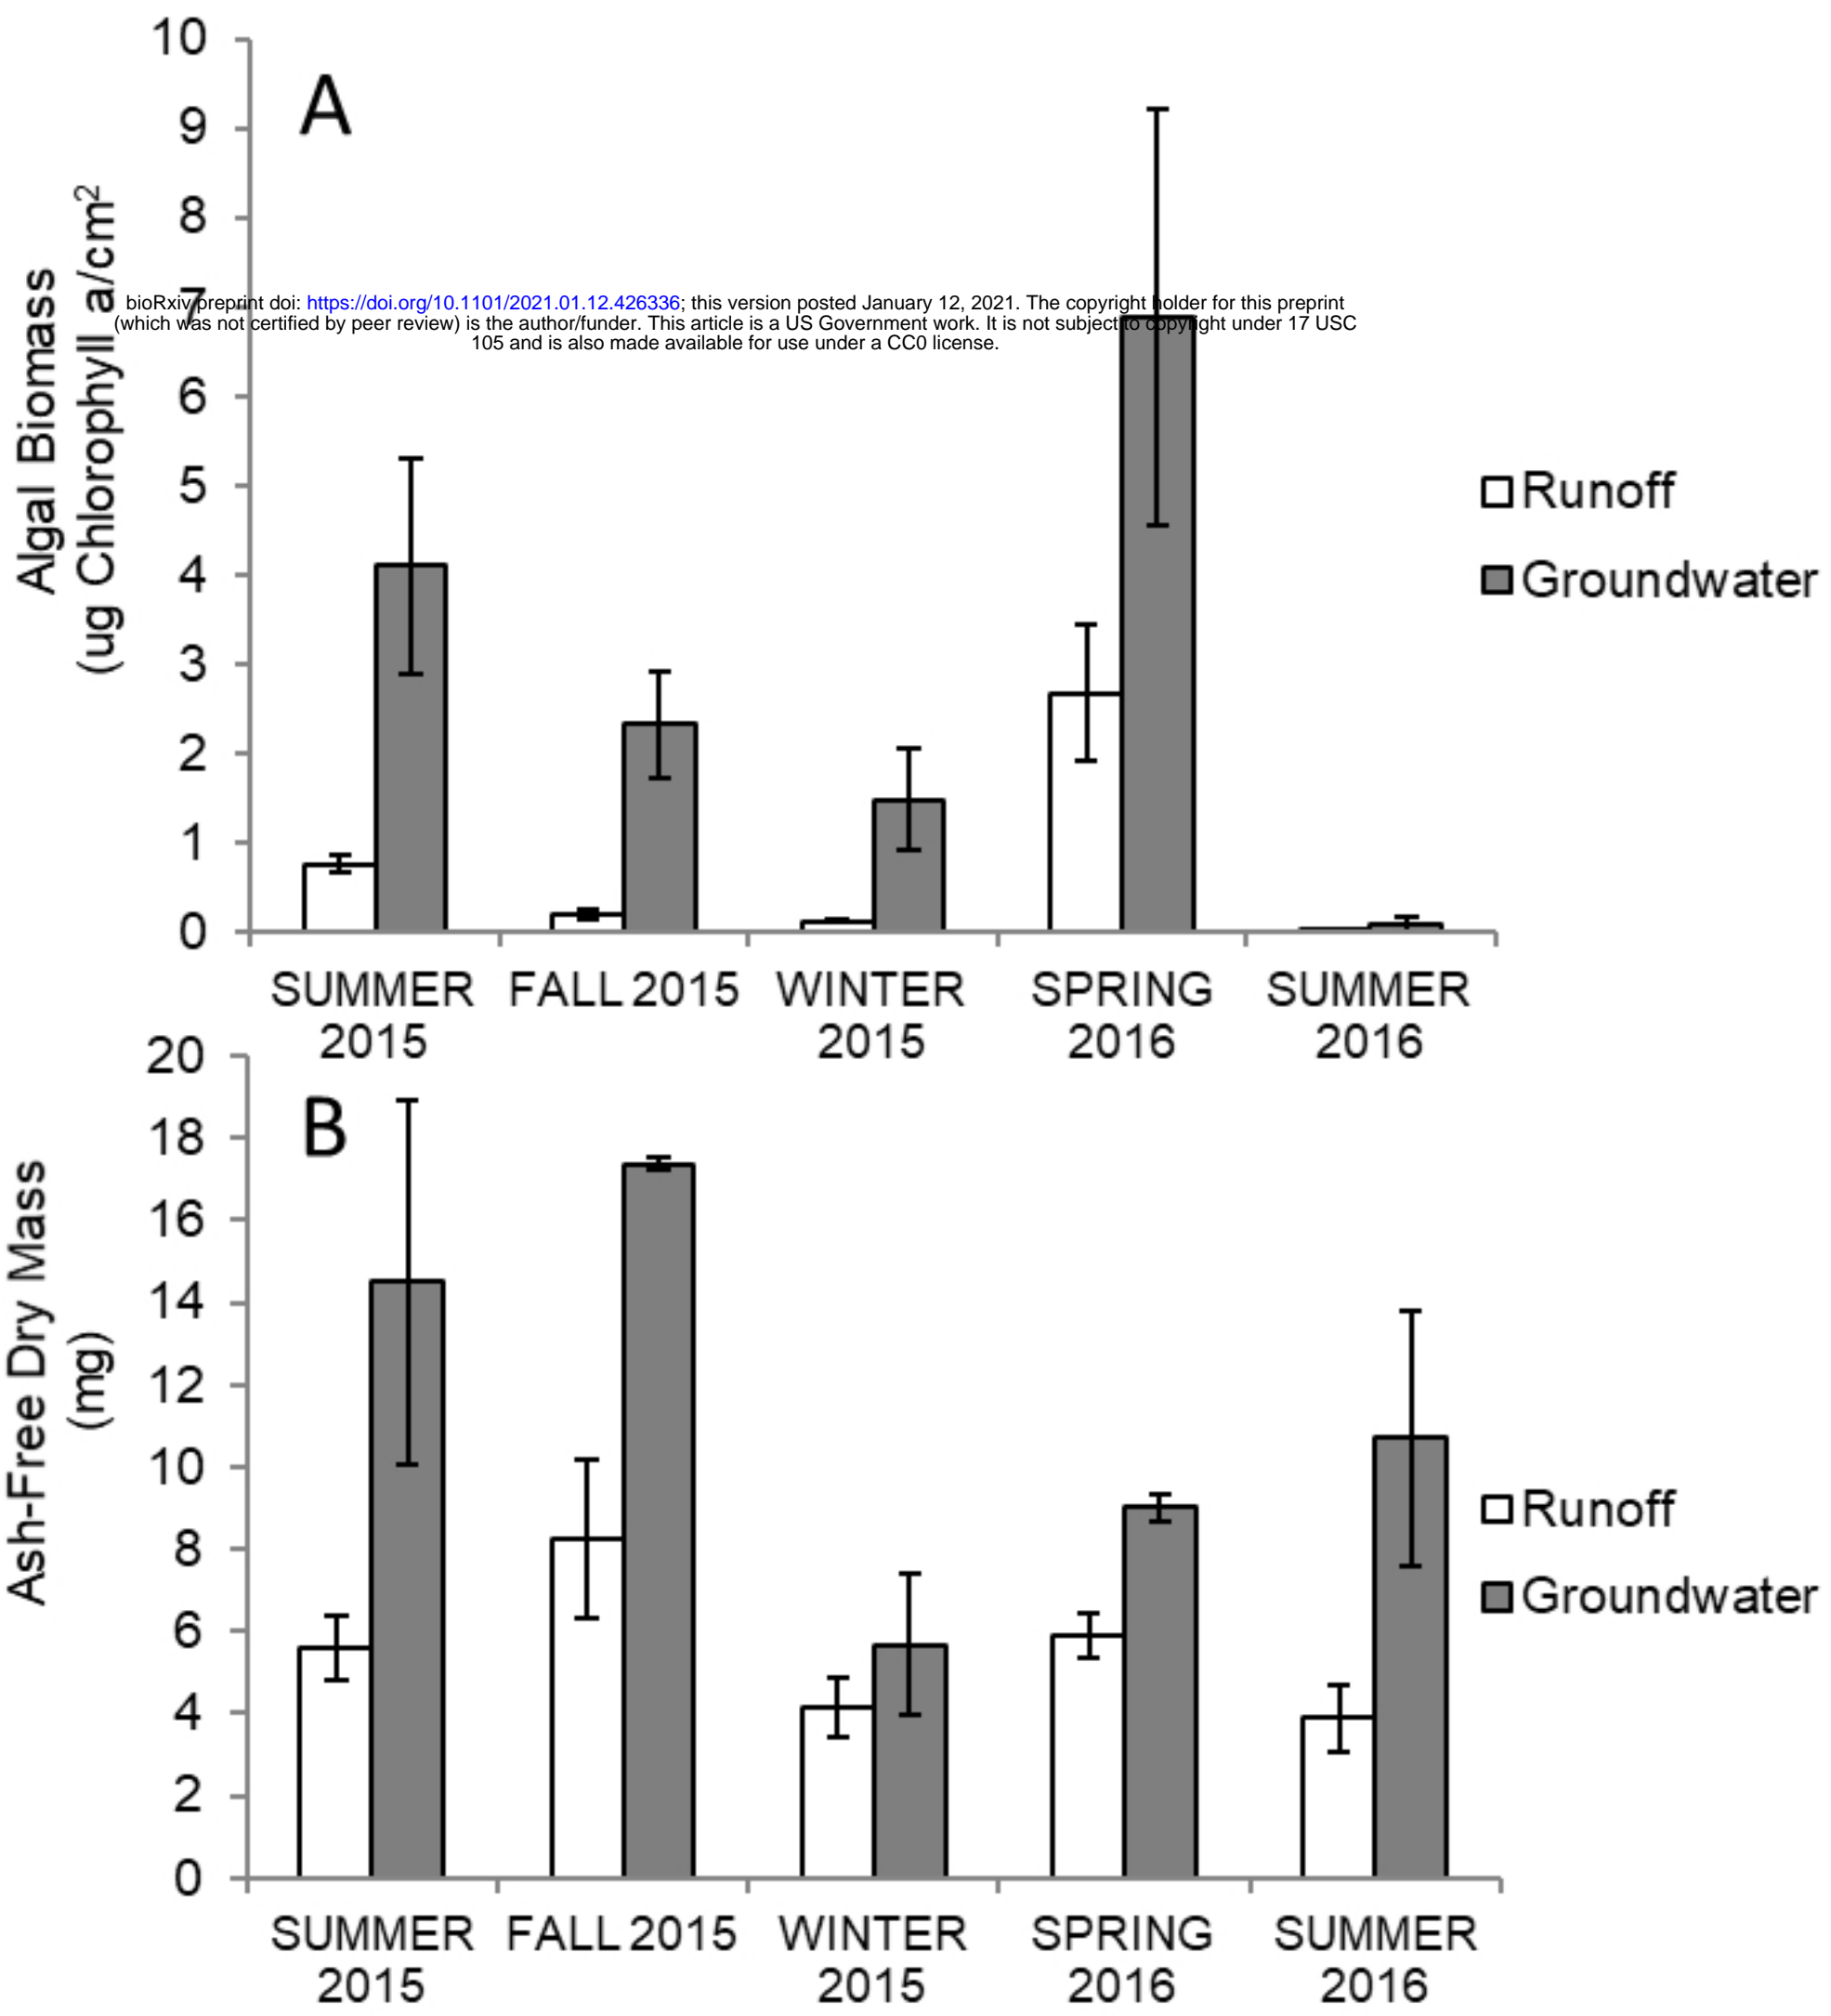

Figure 7

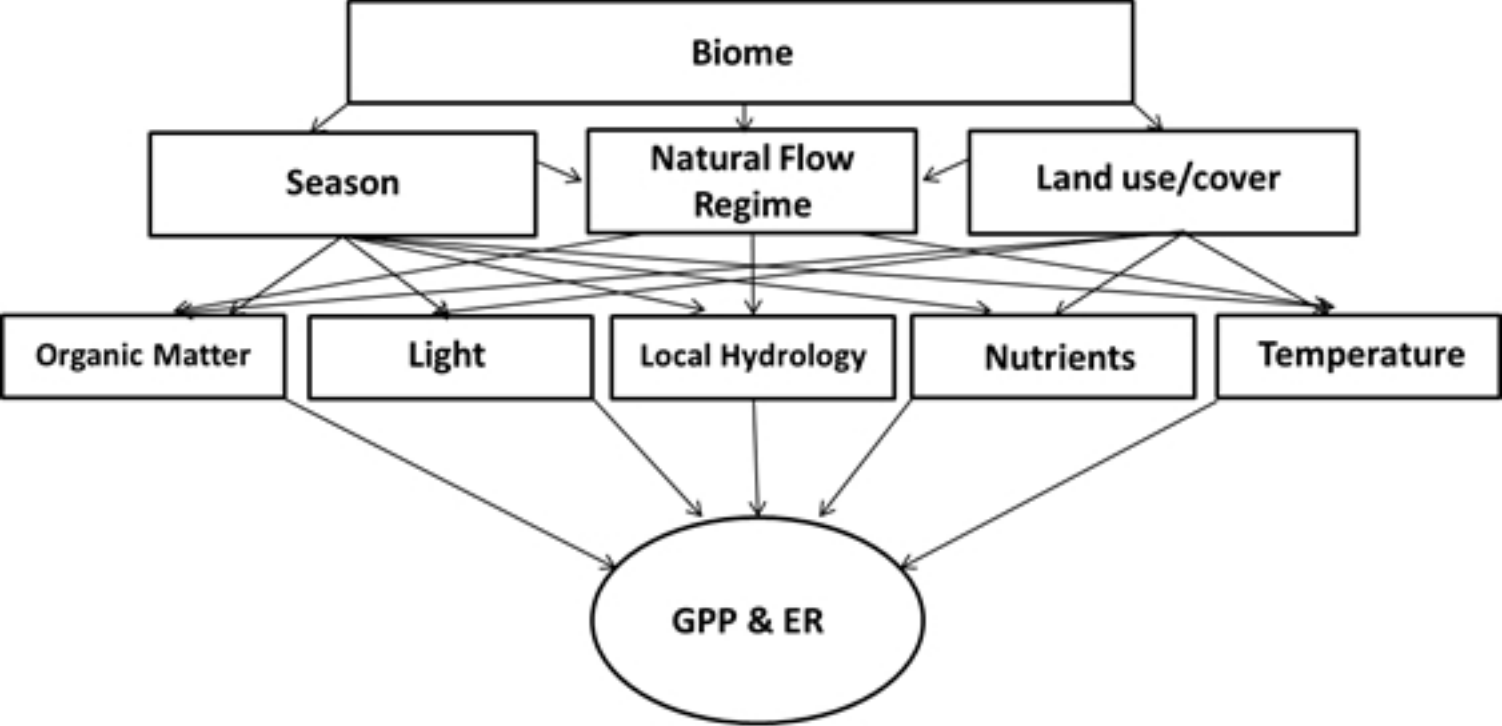

Figure 1
